# Supplementary material
Source: PubMed Central journal article supplement (PMC7328648)
Supplement: mmc1.pdf [file mmc1.pdf]

## **Description of supplementary materials**

### **Supplementary Figures:**

Supplementary Figure 1. Secondary structure predicted for the S protein of SARS-CoV-2.

Supplementary Figure 2. Secondary structure predicted for the M protein of SARS-CoV-2.

Supplementary Figure 3. Secondary structure predicted for the N protein of SARS-CoV-2.

Supplementary Figure 4. Antigenicity estimation of the full-length S protein.

Supplementary Figure 5. Antigenicity estimation of the full-length M protein.

Supplementary Figure 6. The score value of discontinuous epitopes predicted by discotope using Chain\_A, Chain\_B, and Chain\_C of the SARS-CoV-2 S protein.

Supplementary Figure 7. The graphical presentation of predicted interactions between MHC class I binding T-cell epitopes from M protein and HLA alleles.

Supplementary Figure 8. The graphical presentation of predicted interactions between MHC class I binding T-cell epitopes from N protein and HLA alleles.

Supplementary Figure 9. The conservation status of S protein in the coronaviruses.

Supplementary Figure 10. The conservation status of M protein in the coronaviruses.

Supplementary Figure 11. The conservation status of N protein in the coronaviruses.

### **Supplementary Tables:**

Supplementary Table 1. PhysicoChemical parameters of S, M and N protein computed through ExPASy ProtParam.

Supplementary Table 2. Predicted disulphide bonds within residues of S, M and N protein by DiANNA 1.1.

Supplementary Table 3A. B-cell epitopes predicted by IEDB with antigenicity evaluated by VaxiJen.

Supplementary Table 3B. B-cell epitopes predicted by BCEPRED with antigenicity evaluated by VaxiJen.

Supplementary Table 3C. B-cell epitopes predicted by both IEDB and BCEPRED with antigenicity evaluated by VaxiJen > 0.9.

Supplementary Table 3D. Antigenicity score of predicted B-cell epitopes curated from literature.

Supplementary Table 3E. Discontinuous B-cell epitopes predicted by DiscoTope 2 with the discotope score threshold of -3.7 (default setting).

Supplementary Table 4. Discontinuous epitopes in the spike head of S protein.

Supplementary Table 5a. Allergenicity, toxicity, hydro and physiochemical properties of the ten linear B-cell epitopes without allergenicity and toxicity in RBD of S protein.

Supplementary Table 5b. Non-digesting enzymes of the ten linear B-cell epitopes without allergenicity and toxicity in RBD of S protein.

Supplementary Table 6A. MHC class-I allele binding epitopes from S protein.

Supplementary Table 6B. MHC class-I allele binding epitopes from M protein.

Supplementary Table 6C. MHC class-I allele binding epitopes from N protein.

Supplementary Table 7A. MHC class-II allele binding epitopes from S protein.

Supplementary Table 7B. MHC class-II allele binding epitopes from M protein.

Supplementary Table 8A. Allergenicity, toxicity, hydro and physiochemical properties of T-cell epitopes from S protein.

Supplementary Table 8B. Allergenicity, toxicity, hydro and physiochemical properties of T-cell epitopes from M protein.

Supplementary Table 8C. Allergenicity, toxicity, hydro and physiochemical properties of T-cell epitopes from N protein.

Supplementary Table 9A. Non-digesting enzymes of T-cell epitopes from S protein.

Supplementary Table 9B. Non-digesting enzymes of T-cell epitopes from M protein.

Supplementary Table 9C. Non-digesting enzymes of T-cell epitopes from N protein.

Supplementary Table 10. Mutations observed in the 34 non-allergenic and non-toxic linear B-cell epitopes.







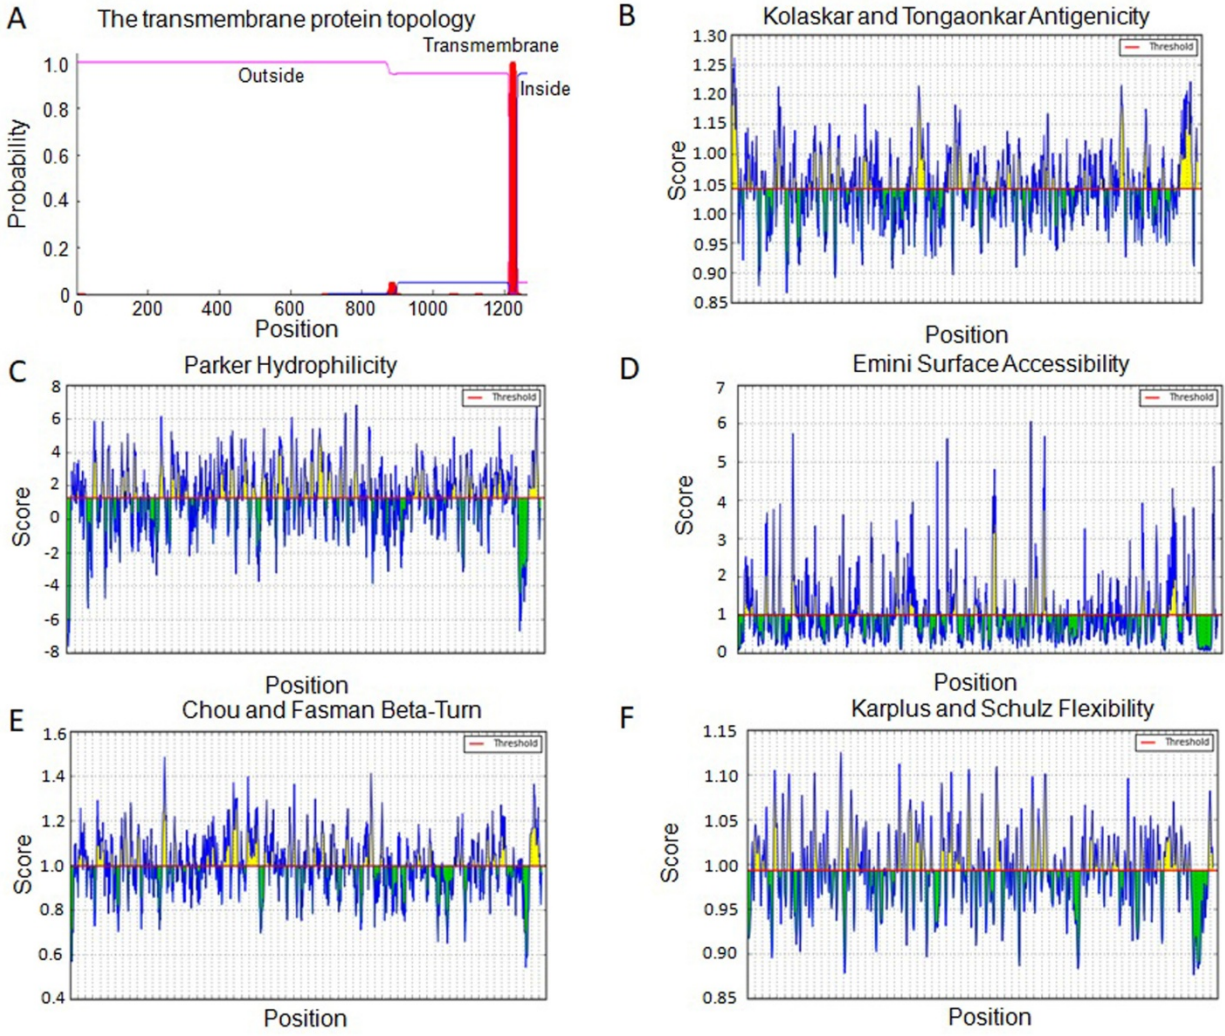

Supplementary Figure 4. Antigenicity estimation of the full-length S protein. (A) The transmembrane protein topology predicted by TMHMM; (B) Antigenicity prediction using Kolaskar and Tongaonkar antigenicity scale; (C) Hydrophilicity prediction using Parker hydrophilicity; (D) Surface accessibility by Emini surface accessibility; (E) Beta turns prediction by Chou and Fasman beta-turn; (F) Flexibility by Karplus and Schulz flexibility.

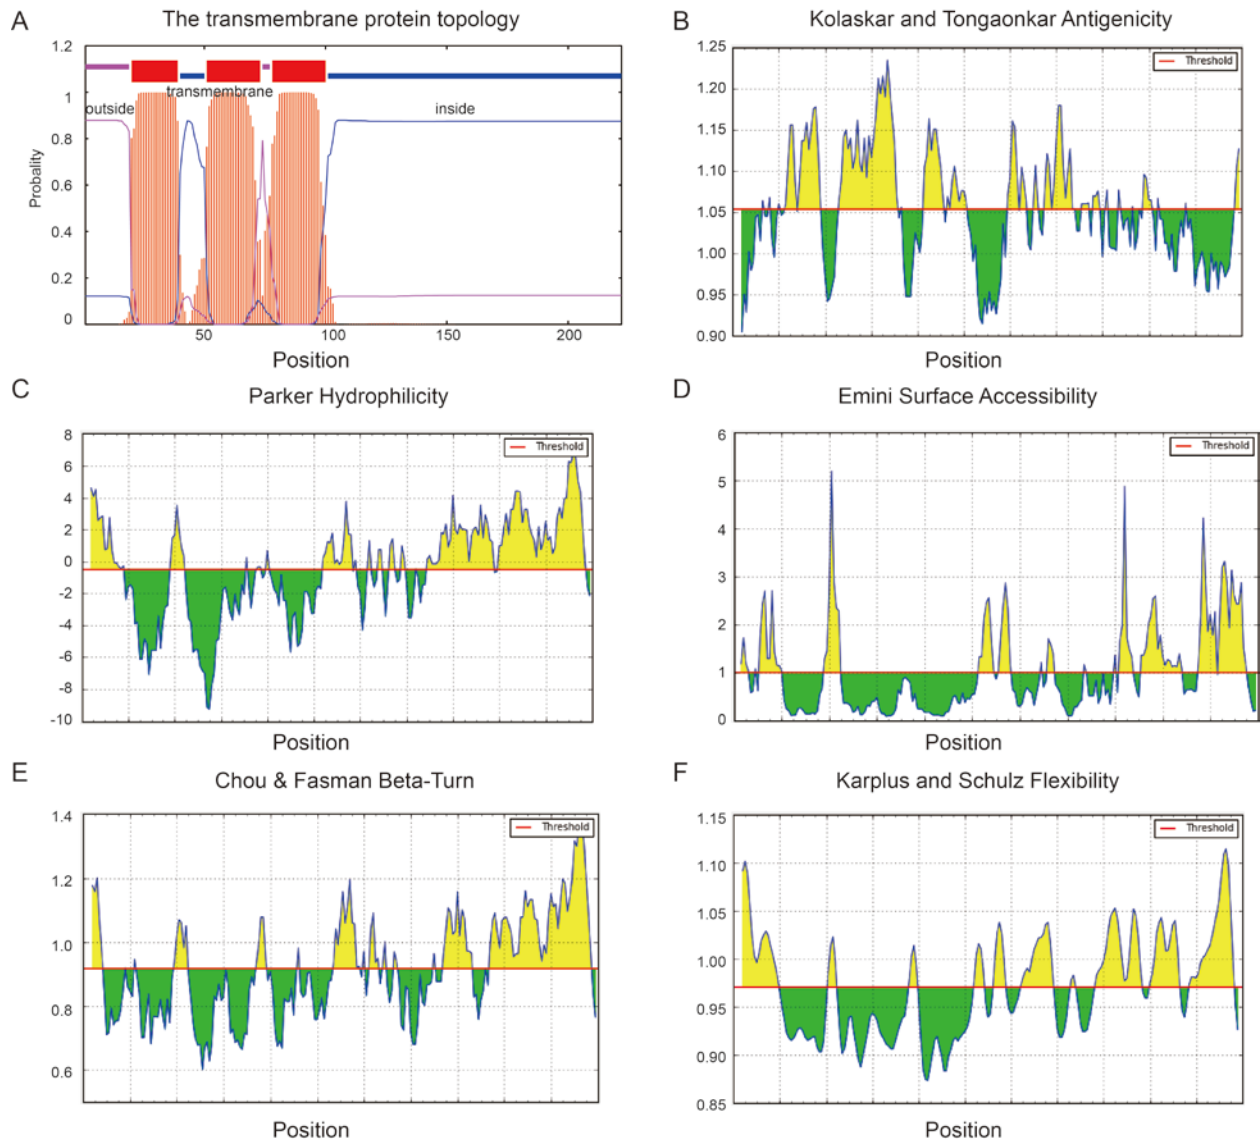

Supplementary Figure 5. Antigenicity estimation of the full-length M protein. (A) The transmembrane protein topology predicted by TMHMM; (B) Antigenicity prediction using Kolaskar and Tongaonkar antigenicity scale; (C) Hydrophilicity prediction using Parker hydrophilicity; (D) Surface accessibility by Emini surface accessibility; (E) Beta turns prediction by Chou and Fasman beta-turn; (F) Flexibility by Karplus and Schulz flexibility.

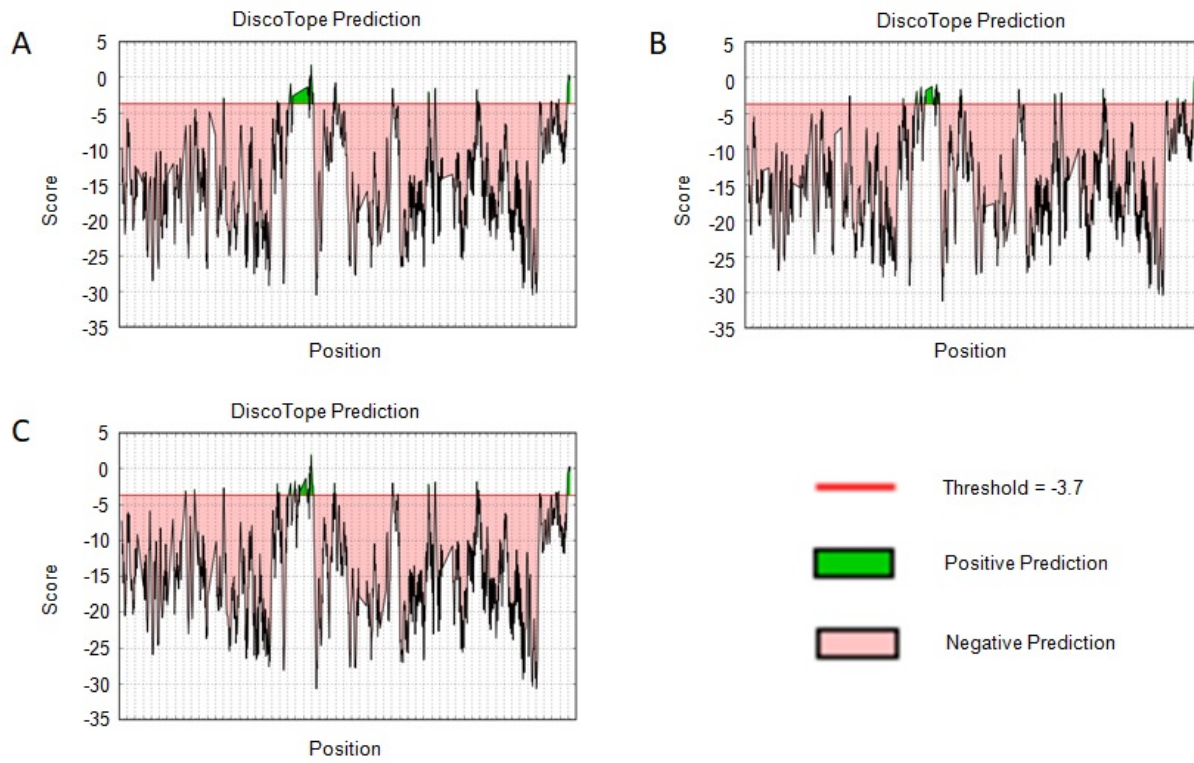

Supplementary Figure 6. The score value of discontinuous epitopes predicted by discotope using Chain\_A (A), Chain\_B (B), and Chain\_C (C) of the SARS-CoV-2 S protein.



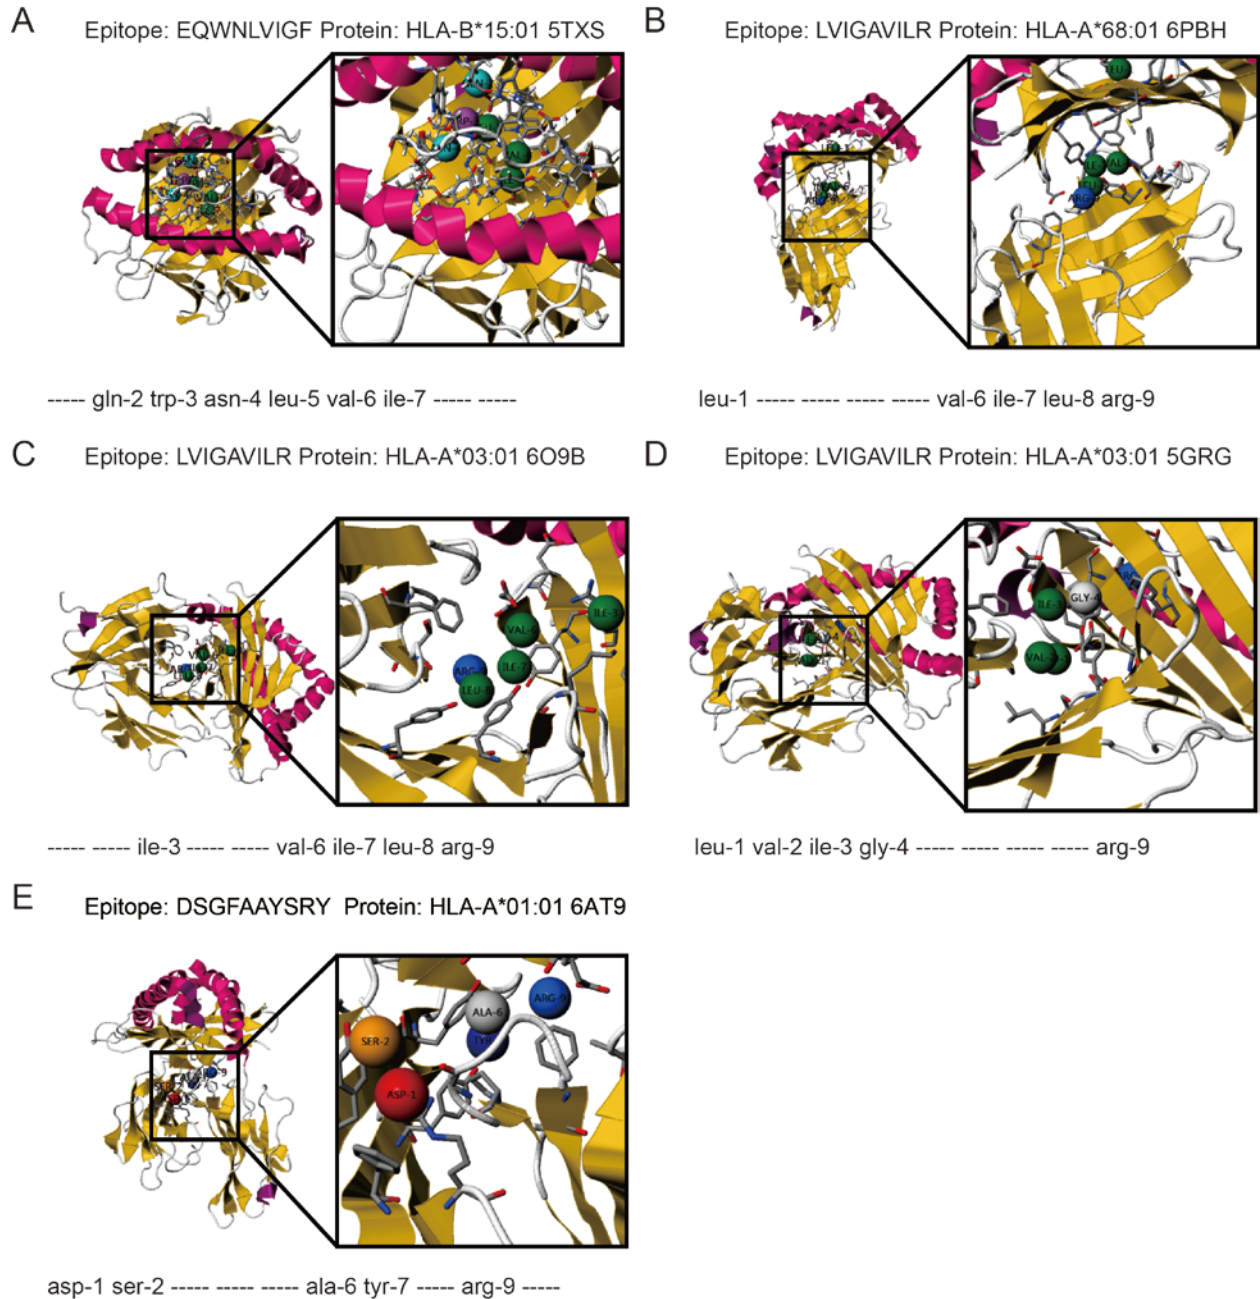

Supplementary Figure 7. The graphical presentation of predicted interactions between MHC class I binding T-cell epitopes from M protein and HLA alleles. ‘EQWNLVIGF’ with HLA-B:\*15:01(PDB ID 5TXS) (A), ‘LVIGAVILR’ with HLA-A\*68:01 (PDB ID 6PBH) (B), HLA-A\*03:01 (PDB ID 6O9B) (C) and HLA-A\*03:01 (PDB ID 5GRG) (D), and ‘DSGFAAYSRY’ with HLA-A\*01:01(PDB ID 6AT9) (E), respectively.

A Epitope: GKMKDLSRW Protein: HLA-B\*57:01 3X11

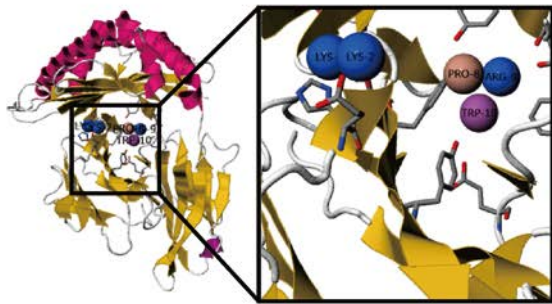

---- lys-2 ---- lys-4 ----- pro-8 arg-9 trp-10

B Epitope: GKMKDLSRW Protein: HLA-B\*58:01 (5IM7)

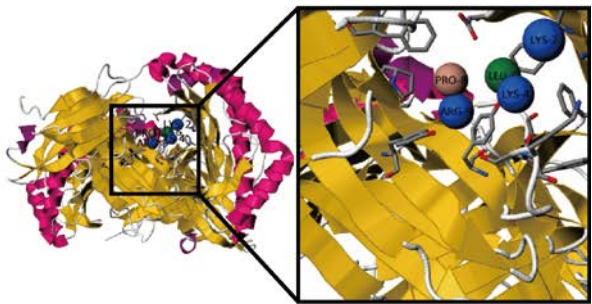

---- lys-2 ---- lys-4 ---- leu-6 ---- pro-8 arg-9 ----

Supplementary Figure 8. The graphical presentation of predicted interactions between MHC class I binding T-cell epitopes from N protein and HLA alleles. 'GKMKDLSRW' with HLA-B:\*57:01(PDB ID 3X11) (A) and HLA-A\*58:01 (PDB ID 5IM7) (B), respectively.

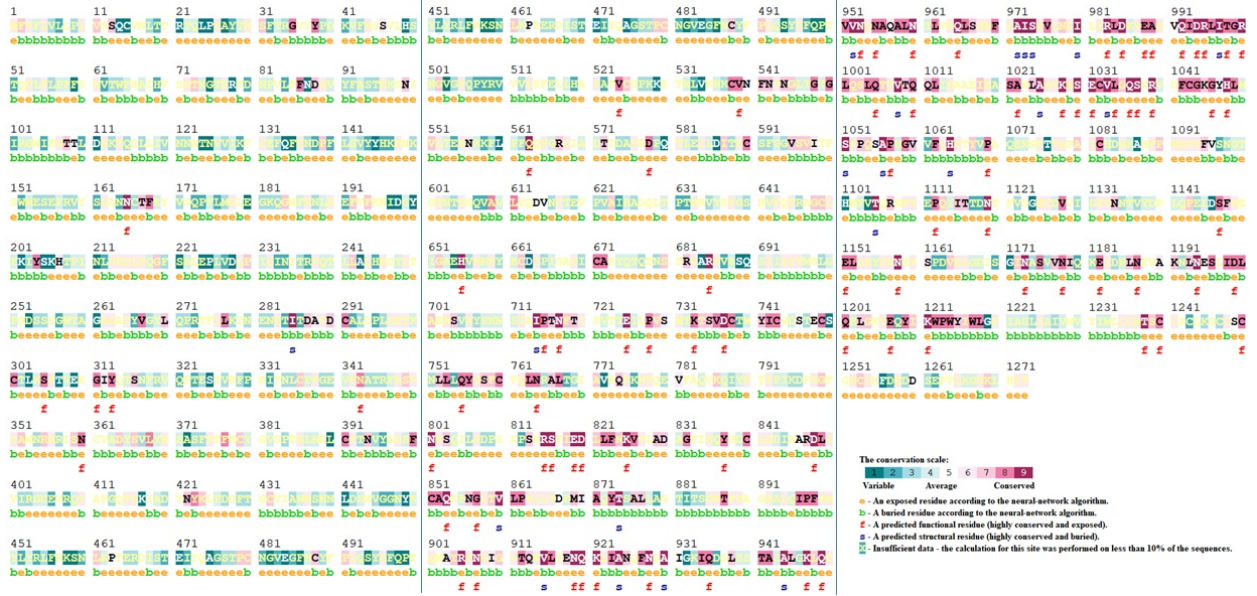

Supplementary Figure 9. The conservation status of S protein in the coronaviruses. Seven known coronaviruses includes SARS-CoV-2 (YP\_009724390.1), SARS-CoV (NP\_828851.1), MERS-CoV (YP\_009047204.1), alpha coronavirus 229E (NP\_073551.1), alpha coronavirus NL63 (AFV53148.1), beta coronavirus OC43 (YP\_009555241.1) and beta coronavirus HKU1 (AAT98580.1).

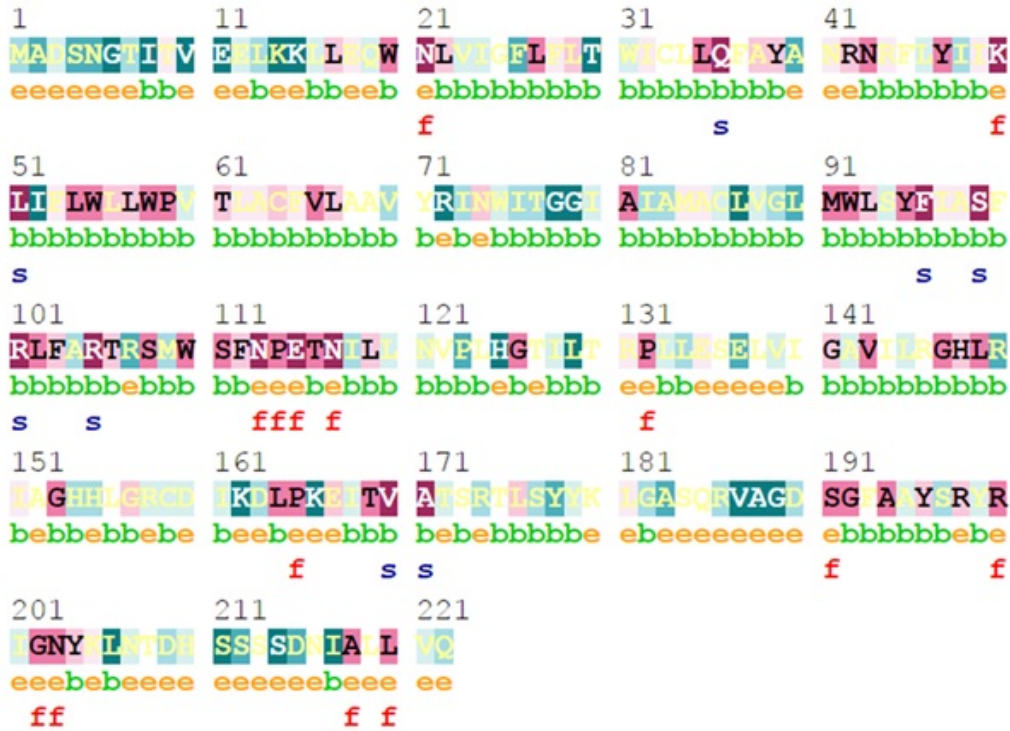

**Legend:**

**The conservation scale:**

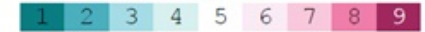

Variable Average Conserved

- e** - An exposed residue according to the neural-network algorithm.
- b** - A buried residue according to the neural-network algorithm.
- f** - A predicted functional residue (highly conserved and exposed).
- s** - A predicted structural residue (highly conserved and buried).
- x** - Insufficient data - the calculation for this site was performed on less than 10% of the sequences.

Supplementary Figure 10. The conservation status of M protein in the coronaviruses. Seven known coronaviruses includes SARS-CoV-2 (YP\_009724390.1), SARS-CoV (NP\_828851.1), MERS-CoV (YP\_009047204.1), alpha coronavirus 229E (NP\_073551.1), alpha coronavirus NL63 (AFV53148.1), beta coronavirus OC43 (YP\_009555241.1) and beta coronavirus HKU1 (AAT98580.1).

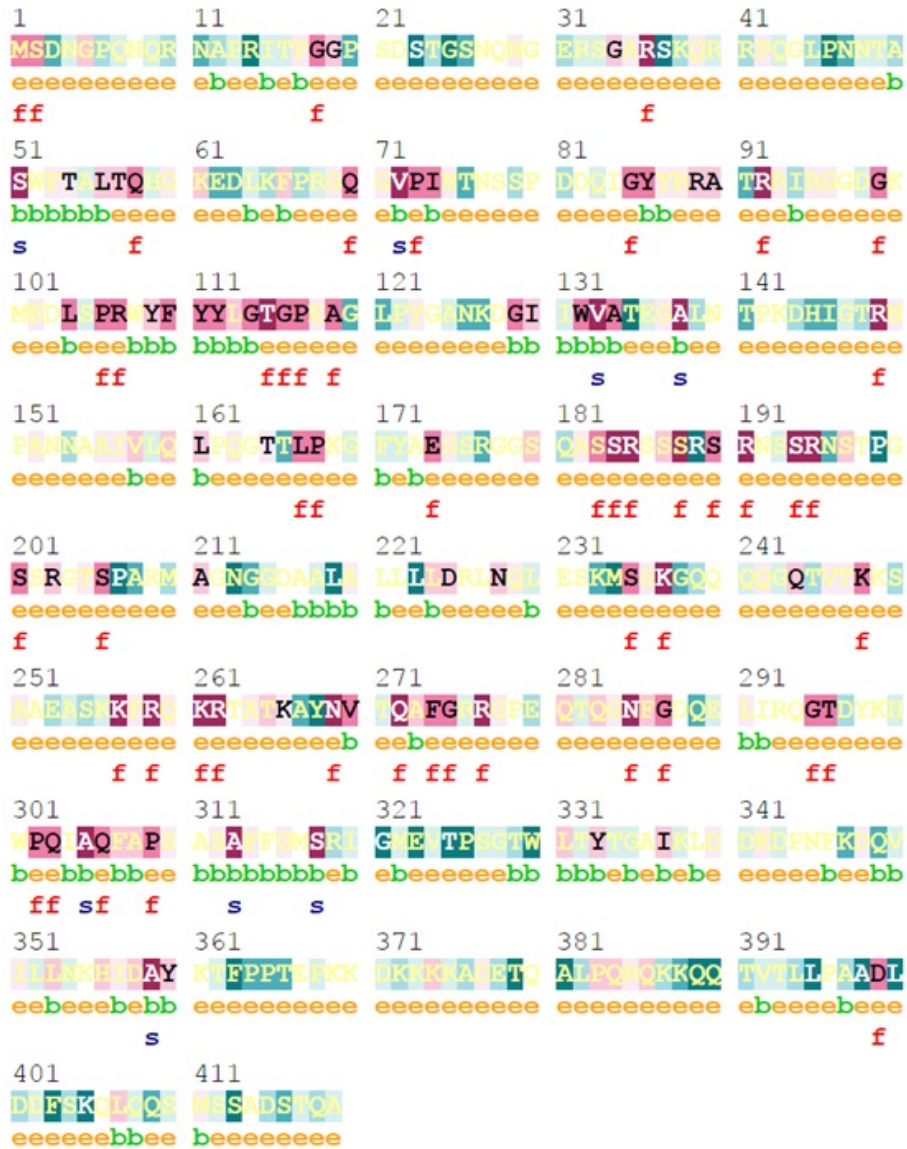

**Legend:**

The conservation scale:

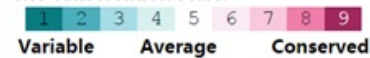

- e** - An exposed residue according to the neural-network algorithm.
- b** - A buried residue according to the neural-network algorithm.
- f** - A predicted functional residue (highly conserved and exposed).
- s** - A predicted structural residue (highly conserved and buried).
- x** - Insufficient data - the calculation for this site was performed on less than 10% of the sequences.

Supplementary Figure 11. The conservation status of N protein in the coronaviruses. Seven known coronaviruses includes SARS-CoV-2 (YP\_009724390.1), SARS-CoV (NP\_828851.1), MERS-CoV (YP\_009047204.1), alpha coronavirus 229E (NP\_073551.1), alpha coronavirus NL63 (AFV53148.1), beta coronavirus OC43 (YP\_009555241.1) and beta coronavirus HKU1 (AAT98580.1).

**Supplementary Table 1:** PhysicoChemical parameters of S, M and N protein computed through ExPASy ProtParam.

S: spike

| <b>Parameters</b>                              | <b>SARS-CoV-2 S protein</b> |      |      |
|------------------------------------------------|-----------------------------|------|------|
| Mol. Weight                                    | 141178.47 Dalton            |      |      |
| No. of amino acids                             | 1273                        |      |      |
| Theoretical <i>pI</i>                          | 6.24                        |      |      |
| Instability index (II)                         | 33.01 (stable)              |      |      |
| No. of Negatively Charged Residues (Asp + Glu) | 110                         |      |      |
| No. of Positively Charged Residues (Arg + Lys) | 103                         |      |      |
| Aliphatic Index                                | 84.67                       |      |      |
| Grand average of Hydropathicity (GRAVY)        | -0.079                      |      |      |
| Atomic Composition                             | Carbon                      | 6336 |      |
|                                                | Hydrogen                    | 9770 |      |
|                                                | Nitrogen                    | 1656 |      |
|                                                | Oxygen                      | 1894 |      |
|                                                | Sulfur                      | 54   |      |
| Amino Acid Composition                         | Ala (A)                     | 79   | 6.2% |
|                                                | Arg (R)                     | 42   | 3.3% |
|                                                | Asn (N)                     | 88   | 6.9% |
|                                                | Asp (D)                     | 62   | 4.9% |
|                                                | Cys (C)                     | 40   | 3.1% |
|                                                | Gln (Q)                     | 62   | 4.9% |
|                                                | Glu (E)                     | 48   | 3.8% |
|                                                | Gly (G)                     | 82   | 6.4% |
|                                                | His (H)                     | 17   | 1.3% |
|                                                | Ile (I)                     | 76   | 6.0% |
|                                                | Leu (L)                     | 108  | 8.5% |
|                                                | Lys (K)                     | 61   | 4.8% |
|                                                | Met (M)                     | 14   | 1.1% |
|                                                | Phe (F)                     | 77   | 6.0% |
|                                                | Pro (P)                     | 58   | 4.6% |
|                                                | Ser (S)                     | 99   | 7.8% |
|                                                | Thr (T)                     | 97   | 7.6% |
|                                                | Trp (W)                     | 12   | 0.9% |
|                                                | Tyr (Y)                     | 54   | 4.2% |
|                                                | Val (V)                     | 97   | 7.6% |
|                                                | Pyl (O)                     | 0    | 0%   |
|                                                | Sec (U)                     | 0    | 0%   |

M: membrane\_glycoprotein

| <b>Parameters</b>                              |            | <b>SARS-CoV-2 M protein</b> |
|------------------------------------------------|------------|-----------------------------|
| Mol. Weight                                    |            | 25146.62                    |
| No. of amino acids                             |            | 222                         |
| Theoretical pI                                 |            | 9.51                        |
| Instability index (II)                         |            | 39.14                       |
| No. of Negatively Charged Residues (Asp + Glu) |            | 13                          |
| No. of Positively Charged Residues (Arg + Lys) |            | 21                          |
| Aliphatic Index                                |            | 120.86                      |
| Grand average of Hydropathicity (GRAVY)        |            | 0.446                       |
| Atomic Composition                             |            |                             |
|                                                | Carbon C   | 1165                        |
|                                                | Hydrogen H | 1823                        |
|                                                | Nitrogen N | 303                         |
|                                                | Oxygen O   | 301                         |
|                                                | Sulfur S   | 8                           |
| Amino Acid Composition                         |            |                             |
|                                                | Ala (A) 19 | 8.60%                       |
|                                                | Arg (R) 14 | 6.30%                       |
|                                                | Asn (N) 11 | 5.00%                       |
|                                                | Asp (D) 6  | 2.70%                       |
|                                                | Cys (C) 4  | 1.80%                       |
|                                                | Gln (Q) 4  | 1.80%                       |
|                                                | Glu (E) 7  | 3.20%                       |
|                                                | Gly (G) 14 | 6.30%                       |
|                                                | His (H) 5  | 2.30%                       |
|                                                | Ile (I) 20 | 9.00%                       |
|                                                | Leu (L) 35 | 15.80%                      |
|                                                | Lys (K) 7  | 3.20%                       |
|                                                | Met (M) 4  | 1.80%                       |
|                                                | Phe (F) 11 | 5.00%                       |
|                                                | Pro (P) 5  | 2.30%                       |
|                                                | Ser (S) 15 | 6.80%                       |
|                                                | Thr (T) 13 | 5.90%                       |
|                                                | Trp (W) 7  | 3.20%                       |
|                                                | Tyr (Y) 9  | 4.10%                       |
|                                                | Val (V) 12 | 5.40%                       |
|                                                | Pyl (O) 0  | 0.00%                       |
|                                                | Sec (U) 0  | 0.00%                       |

N: nucleocapsid\_phosphoprotein

| Parameters                                     | SARS-CoV-2 N protein |   |      |
|------------------------------------------------|----------------------|---|------|
| Mol. Weight                                    | 45625.7              |   |      |
| No. of amino acids                             | 419                  |   |      |
| Theoretical pI                                 | 10.07                |   |      |
| Instability index (II)                         | 55.09                |   |      |
| No. of Negatively Charged Residues (Asp + Glu) | 36                   |   |      |
| No. of Positively Charged Residues (Arg + Lys) | 60                   |   |      |
| Aliphatic Index                                | 52.53                |   |      |
| Grand average of Hydropathicity (GRAVY)        | -0.971               |   |      |
| Atomic Composition                             | Carbon               | C | 1971 |
|                                                | Hydrogen             | H | 3137 |
|                                                | Nitrogen             | N | 607  |
|                                                | Oxygen               | O | 629  |
|                                                | Sulfur               | S | 7    |

| Amino Acid Composition |    |  |        |
|------------------------|----|--|--------|
| Ala (A)                | 37 |  | 8.80%  |
| Arg (R)                | 29 |  | 6.90%  |
| Asn (N)                | 22 |  | 5.30%  |
| Asp (D)                | 24 |  | 5.70%  |
| Cys (C)                | 0  |  | 0.00%  |
| Gln (Q)                | 35 |  | 8.40%  |
| Glu (E)                | 12 |  | 2.90%  |
| Gly (G)                | 43 |  | 10.30% |
| His (H)                | 4  |  | 1.00%  |
| Ile (I)                | 14 |  | 3.30%  |
| Leu (L)                | 27 |  | 6.40%  |
| Lys (K)                | 31 |  | 7.40%  |
| Met (M)                | 7  |  | 1.70%  |
| Phe (F)                | 13 |  | 3.10%  |
| Pro (P)                | 28 |  | 6.70%  |
| Ser (S)                | 37 |  | 8.80%  |
| Thr (T)                | 32 |  | 7.60%  |
| Trp (W)                | 5  |  | 1.20%  |
| Tyr (Y)                | 11 |  | 2.60%  |
| Val (V)                | 8  |  | 1.90%  |
| Pyl (O)                | 0  |  | 0.00%  |
| Sec (U)                | 0  |  | 0.00%  |



**Supplementary Table 2:** Predicted disulphide bonds within residues of S, M and N protein by DiANNA 1.1.

S protein:

| <b>Serial no</b> | <b>positions</b> | <b>peptide bonds</b>       | <b>scores</b> |
|------------------|------------------|----------------------------|---------------|
| 1                | 15 - 1240        | LVSSQCVNLTT - CCMTSCCCLK   | 0.9725        |
| 2                | 131 - 391        | VVIKVCEFQFC - KLNDLCFTNVY  | 0.986         |
| 3                | 136 - 662        | CEFQFCNDPFL - NNSYECDIPIG  | 0.9966        |
| 4                | 166 - 1236       | SSANNCTFEYV - TIMLCCMTSCC  | 0.9983        |
| 5                | 291 - 671        | TDAVDCALDPL - IGAGICASYQT  | 0.9094        |
| 6                | 301 - 336        | LSETKCTLKSF - NITNLCPFGEV  | 0.9941        |
| 7                | 361 - 488        | KRISNCVADYS - VEGFNCFYFPLQ | 0.997         |
| 8                | 379 - 743        | FSTFKCYGVSP - CTMYICGDSTE  | 0.9972        |
| 9                | 432 - 1235       | DDFTGCVIAWN - VTIMLCCMTSC  | 0.9988        |
| 10               | 480 - 1248       | AGSTPCNGVEG - CLKGCCSCGSC  | 0.9987        |
| 11               | 525 - 1247       | APATVCGPKKS - SCLKGCCSCGS  | 0.5136        |
| 12               | 538 - 1043       | LVKNKCVNFNF - KRVDFCGKGYH  | 0.9995        |
| 13               | 590 - 617        | LDITPCSFGGV - YQDVNCTEVPV  | 1             |
| 14               | 649 - 1241       | QTRAGCLIGAE - CMTSCCCLKG   | 0.9997        |
| 15               | 738 - 1243       | KTSVDCTMYIC - TSCCCLKGCC   | 0.0104        |
| 16               | 749 - 1126       | GDSTECNLLL - FVSGNCDVVIG   | 0.9914        |
| 17               | 760 - 1250       | QYGSFCTQLNR - KGCCSCGSCK   | 0.8063        |
| 18               | 840 - 1032       | KQYGDCLGDIA - TKMSECVLGQS  | 0.9756        |
| 19               | 851 - 1254       | ARDLICAQKFN - SCGSCCKFDED  | 0.9996        |
| 20               | 1082 - 1253      | TAPAICHGKA - CSCGSCCKFDE   | 0.0575        |

M protein:

| <b>Serial No.</b> | <b>Positions</b> | <b>Peptide bonds</b>    | <b>Score</b> |
|-------------------|------------------|-------------------------|--------------|
| 1                 | 33 - 64          | FLTWICLLQFA-PVTLACFVLAA | 0.01039      |
| 2                 | 33 - 86          | FLTWICLLQFA-AIAMACLVGLM | 0.01063      |
| 3                 | 33 - 159         | FLTWICLLQFA-HHLGRCDIKDL | 0.012        |
| 4                 | 64 - 86          | PVTLACFVLAA-AIAMACLVGLM | 0.01037      |
| 5                 | 64 - 159         | PVTLACFVLAA-HHLGRCDIKDL | 0.0107       |
| 6                 | 86 - 159         | AIAMACLVGLM-HHLGRCDIKDL | 0.01043      |

N protein:

No disulfide bonds are possible for this sequence, the prediction will not be attempted

Supplementary Table 3A. B-cell epitopes predicted by IEDB with antigenicity evaluated by VaxiJen.

| start | end  | peptide                                                     | vaxijen | method                               | Protein | Peptide Length |
|-------|------|-------------------------------------------------------------|---------|--------------------------------------|---------|----------------|
| 21    | 31   | RTQLPPAYTNS                                                 | 0.871   | Bepipred                             | S       | 11             |
| 71    | 81   | SGTNGTKRFDN                                                 | 0.5906  | Bepipred                             | S       | 11             |
| 181   | 186  | GKQGNF                                                      | 2.1342  | Bepipred                             | S       | 6              |
| 249   | 261  | LTPGDSSSGWTAG                                               | 0.495   | Bepipred                             | S       | 13             |
| 282   | 287  | NGTTD                                                       | 1.1184  | Bepipred                             | S       | 6              |
| 318   | 324  | FRVQPTE                                                     | 1.6729  | Bepipred                             | S       | 7              |
| 407   | 420  | VRQIAPGQTGKIAD                                              | 1.2606  | Bepipred                             | S       | 14             |
| 423   | 428  | YKLPDD                                                      | -0.9691 | Bepipred                             | S       | 6              |
| 439   | 447  | NNLDSKVG                                                    | 0.8904  | Bepipred                             | S       | 9              |
| 473   | 483  | YQAGSTPCNGV                                                 | 0.0881  | Bepipred                             | S       | 11             |
| 495   | 506  | YGFQPTNGVGYQ                                                | 0.7136  | Bepipred                             | S       | 12             |
| 523   | 532  | TVCGPKKSTN                                                  | -0.0257 | Bepipred                             | S       | 10             |
| 567   | 580  | RDIADTTDAVRDPQ                                              | 0.44    | Bepipred                             | S       | 14             |
| 597   | 606  | VITPGTNTSN                                                  | 0.4217  | Bepipred                             | S       | 10             |
| 675   | 687  | QTQNSPRRARSV                                                | 0.1763  | Bepipred                             | S       | 13             |
| 772   | 780  | VEQDKNTQE                                                   | 0.0684  | Bepipred                             | S       | 9              |
| 788   | 797  | IYKTPPIKDF                                                  | -0.1626 | Bepipred                             | S       | 10             |
| 805   | 816  | ILPDPSKPSKRS                                                | 0.5322  | Bepipred                             | S       | 12             |
| 936   | 941  | DSLST                                                       | 0.7417  | Bepipred                             | S       | 6              |
| 1069  | 1077 | PAQEKNTT                                                    | 0.382   | Bepipred                             | S       | 9              |
| 1137  | 1148 | VYDPLQPELDSF                                                | 0.0903  | Bepipred                             | S       | 12             |
| 1157  | 1167 | KNHTSPDVLG                                                  | 1.4039  | Bepipred                             | S       | 11             |
| 1256  | 1265 | FDEDDSEPV                                                   | 0.3154  | Bepipred                             | S       | 10             |
| 13    | 37   | SQCVNLTRTQLPPAYTNSFTRGVY                                    | 0.686   | Bepipred2.0                          | S       | 25             |
| 59    | 81   | FSNVTWFHAIHVSQTNGTKRFDN                                     | 0.6767  | Bepipred2.0                          | S       | 23             |
| 138   | 154  | DPFLGVYHKNKSWME                                             | 0.5821  | Bepipred2.0                          | S       | 17             |
| 177   | 189  | MDLEGKQGNFKNL                                               | 1.2592  | Bepipred2.0                          | S       | 13             |
| 206   | 221  | KHTPINLVRDLPGGFS                                            | 0.6403  | Bepipred2.0                          | S       | 16             |
| 250   | 260  | TPGDSSSGWTA                                                 | 0.2473  | Bepipred2.0                          | S       | 11             |
| 304   | 322  | KSFTVEKGIYQTSNFRVQP                                         | 0.5729  | Bepipred2.0                          | S       | 19             |
| 329   | 363  | FPNITNLCFGEVFNATRFASVYAWNKRISNCVA                           | 0.4466  | Bepipred2.0                          | S       | 35             |
| 369   | 393  | YNSASFSTFKCYGVSPTKLNDLCFT                                   | 1.4031  | Bepipred2.0                          | S       | 25             |
| 404   | 426  | GDEVVRQIAPGQTGKIADYNYKLP                                    | 1.1017  | Bepipred2.0                          | S       | 23             |
| 440   | 501  | NLDSKVGNNYLYRFLRKSNLKPFERDISTEIQAGSTPCNGVEGFNCYFPLQSYGFQPTN | 0.3951  | Bepipred2.0                          | S       | 62             |
| 516   | 536  | ELLHAPATVCGPKKSTNLVK                                        | 0.0029  | Bepipred2.0                          | S       | 21             |
| 555   | 562  | SNKKFLPF                                                    | 1.3952  | Bepipred2.0                          | S       | 8              |
| 616   | 632  | NCTEVPVAIHADQLTPT                                           | 0.3987  | Bepipred2.0                          | S       | 17             |
| 634   | 644  | RVYSTGNSVVFQ                                                | -0.1    | Bepipred2.0                          | S       | 11             |
| 656   | 666  | VNNSYECDIPI                                                 | 0.6124  | Bepipred2.0                          | S       | 11             |
| 672   | 690  | ASYQTQNSPRRARSVASQ                                          | 0.2556  | Bepipred2.0                          | S       | 19             |
| 695   | 710  | YTMSLGAENSVAYSNN                                            | 0.6434  | Bepipred2.0                          | S       | 16             |
| 773   | 779  | EQDKNTQ                                                     | 0.1017  | Bepipred2.0                          | S       | 7              |
| 786   | 800  | KQIYKTPPIKDFGGF                                             | -0.3896 | Bepipred2.0                          | S       | 15             |
| 807   | 814  | PDPSKPSK                                                    | 0.0621  | Bepipred2.0                          | S       | 8              |
| 828   | 842  | LADAGFIKQYGDCLG                                             | 0.2071  | Bepipred2.0                          | S       | 15             |
| 1035  | 1043 | GQSKRVDFC                                                   | 1.779   | Bepipred2.0                          | S       | 9              |
| 1107  | 1118 | RNFYEQIITD                                                  | 0.3529  | Bepipred2.0                          | S       | 12             |
| 1133  | 1172 | VNNTVYDPLQPELDSFKEELDKYFKNHTSPDVLGDISGI                     | 0.1613  | Bepipred2.0                          | S       | 40             |
| 1252  | 1267 | SCCKFDEDDSEPVKLG                                            | 0.4347  | Bepipred2.0                          | S       | 16             |
| 4     | 18   | FLVLLPLVSSQCVNL                                             | 0.8302  | Kolaskar and Tongaonkar antigenicity | S       | 15             |
| 34    | 41   | RGVYYPDK                                                    | 1.0191  | Kolaskar and Tongaonkar antigenicity | S       | 8              |
| 44    | 51   | RSSVLHST                                                    | 0.5459  | Kolaskar and Tongaonkar antigenicity | S       | 8              |
| 53    | 60   | DLFLPFFS                                                    | -0.3099 | Kolaskar and Tongaonkar antigenicity | S       | 8              |
| 65    | 70   | FHAIHV                                                      | 1.6766  | Kolaskar and Tongaonkar antigenicity | S       | 6              |
| 81    | 87   | NPVLPFN                                                     | 0.5863  | Kolaskar and Tongaonkar antigenicity | S       | 7              |
| 115   | 121  | QSLIVN                                                      | 0.8168  | Kolaskar and Tongaonkar antigenicity | S       | 7              |
| 125   | 134  | NVVIKVECFQ                                                  | -0.1498 | Kolaskar and Tongaonkar antigenicity | S       | 10             |
| 136   | 146  | CNDPFLGVYH                                                  | 0.4109  | Kolaskar and Tongaonkar antigenicity | S       | 11             |
| 168   | 174  | FEYVSQP                                                     | 0.9073  | Kolaskar and Tongaonkar antigenicity | S       | 7              |
| 210   | 216  | INLVRDL                                                     | -0.3198 | Kolaskar and Tongaonkar antigenicity | S       | 7              |
| 223   | 230  | LEPLVDLP                                                    | -0.3271 | Kolaskar and Tongaonkar antigenicity | S       | 8              |
| 239   | 248  | QTLALHRSY                                                   | 0.5596  | Kolaskar and Tongaonkar antigenicity | S       | 10             |
| 263   | 270  | AAYYVGYL                                                    | 0.5218  | Kolaskar and Tongaonkar antigenicity | S       | 8              |
| 272   | 278  | PRTFLK                                                      | -1.3917 | Kolaskar and Tongaonkar antigenicity | S       | 7              |
| 288   | 295  | AVDCALDP                                                    | 0.773   | Kolaskar and Tongaonkar antigenicity | S       | 8              |
| 333   | 339  | TNLCFPG                                                     | 1.1812  | Kolaskar and Tongaonkar antigenicity | S       | 7              |
| 359   | 371  | SNCVADYSVLNS                                                | -0.1828 | Kolaskar and Tongaonkar antigenicity | S       | 13             |
| 376   | 385  | TFKCYGSVPT                                                  | 1.5059  | Kolaskar and Tongaonkar antigenicity | S       | 10             |
| 430   | 435  | TGCVIA                                                      | 0.4716  | Kolaskar and Tongaonkar antigenicity | S       | 6              |
| 488   | 495  | CYFPLQSY                                                    | 0.9394  | Kolaskar and Tongaonkar antigenicity | S       | 8              |
| 505   | 527  | YQPYRVVLSFELLHAPATVCGP                                      | 0.4697  | Kolaskar and Tongaonkar antigenicity | S       | 23             |
| 592   | 599  | FGGVSVIT                                                    | 0.7715  | Kolaskar and Tongaonkar antigenicity | S       | 8              |
| 607   | 615  | QVAVLYQDV                                                   | 0.265   | Kolaskar and Tongaonkar antigenicity | S       | 9              |
| 617   | 627  | CTEVPVAIHAD                                                 | 0.0499  | Kolaskar and Tongaonkar antigenicity | S       | 11             |
| 647   | 653  | AGCLIGA                                                     | 0.1743  | Kolaskar and Tongaonkar antigenicity | S       | 7              |
| 667   | 674  | GAGICASY                                                    | 0.521   | Kolaskar and Tongaonkar antigenicity | S       | 8              |
| 687   | 693  | VASQSII                                                     | -0.0188 | Kolaskar and Tongaonkar antigenicity | S       | 7              |
| 723   | 730  | TTEILPVS                                                    | 1.2071  | Kolaskar and Tongaonkar antigenicity | S       | 8              |
| 735   | 741  | SVDCMTY                                                     | 1.0932  | Kolaskar and Tongaonkar antigenicity | S       | 7              |
| 750   | 763  | SNLLLQYGSFCTQL                                              | 0.7599  | Kolaskar and Tongaonkar antigenicity | S       | 14             |
| 781   | 788  | VFAQVKQI                                                    | 0.5854  | Kolaskar and Tongaonkar antigenicity | S       | 8              |
| 803   | 808  | SQILPD                                                      | -0.1542 | Kolaskar and Tongaonkar antigenicity | S       | 6              |
| 837   | 843  | YGDCLEQ                                                     | -0.5555 | Kolaskar and Tongaonkar antigenicity | S       | 7              |
| 847   | 853  | RDLICAQ                                                     | 1.1443  | Kolaskar and Tongaonkar antigenicity | S       | 7              |
| 858   | 864  | LTVLPL                                                      | 0.6786  | Kolaskar and Tongaonkar antigenicity | S       | 7              |
| 873   | 880  | YTSALLAG                                                    | 0.3798  | Kolaskar and Tongaonkar antigenicity | S       | 8              |
| 959   | 966  | LNTLVKQL                                                    | -0.7591 | Kolaskar and Tongaonkar antigenicity | S       | 8              |
| 973   | 979  | ISSVLND                                                     | 0.0414  | Kolaskar and Tongaonkar antigenicity | S       | 7              |
| 1002  | 1011 | QSLQTYVTQQ                                                  | -0.1009 | Kolaskar and Tongaonkar antigenicity | S       | 10             |
| 1030  | 1037 | SECVLQGS                                                    | -0.011  | Kolaskar and Tongaonkar antigenicity | S       | 8              |
| 1057  | 1070 | PHGVVFLHVTYVPA                                              | 0.8058  | Kolaskar and Tongaonkar antigenicity | S       | 14             |

|      |      |                                     |         |                                      |   |    |
|------|------|-------------------------------------|---------|--------------------------------------|---|----|
| 1079 | 1085 | PAICHDG                             | -1.01   | Kolaskar and Tongaonkar antigenicity | S | 7  |
| 1123 | 1132 | SGNCDVIGI                           | 0.7421  | Kolaskar and Tongaonkar antigenicity | S | 10 |
| 1174 | 1179 | ASVVNI                              | 0.8671  | Kolaskar and Tongaonkar antigenicity | S | 6  |
| 1221 | 1256 | IAGLIAIVMTIMLCCMTSCCSCLKGCCSCGSCCKF | 0.143   | Kolaskar and Tongaonkar antigenicity | S | 36 |
| 1262 | 1270 | EPVLKGVKL                           | 1.2301  | Kolaskar and Tongaonkar antigenicity | S | 9  |
| 14   | 20   | QCVNLIT                             | 1.5916  | Parker hydrophilicity                | S | 7  |
| 28   | 33   | YTNSFT                              | -0.7122 | Parker hydrophilicity                | S | 6  |
| 47   | 52   | VLHSTQ                              | 0.8948  | Parker hydrophilicity                | S | 6  |
| 70   | 80   | VSGTNGTKRFED                        | 0.8493  | Parker hydrophilicity                | S | 11 |
| 94   | 100  | STEKSNI                             | 0.6662  | Parker hydrophilicity                | S | 7  |
| 109  | 115  | TLDSKTQ                             | 1.2584  | Parker hydrophilicity                | S | 7  |
| 145  | 153  | YHKNNKSWM                           | 0.3388  | Parker hydrophilicity                | S | 9  |
| 161  | 167  | SSANNCT                             | -0.4197 | Parker hydrophilicity                | S | 7  |
| 180  | 188  | EGKQGNFKN                           | 1.1232  | Parker hydrophilicity                | S | 9  |
| 248  | 263  | YLTPGDSSSGWTAGAA                    | 0.465   | Parker hydrophilicity                | S | 16 |
| 280  | 292  | NENGTITDAVDCA                       | 0.5014  | Parker hydrophilicity                | S | 13 |
| 295  | 302  | PLSETKCT                            | 1.2573  | Parker hydrophilicity                | S | 8  |
| 316  | 325  | SNFRVQPTES                          | 1.2078  | Parker hydrophilicity                | S | 10 |
| 356  | 364  | KRISNCVAD                           | 0.0005  | Parker hydrophilicity                | S | 9  |
| 381  | 388  | GVSPTKLN                            | 1.9197  | Parker hydrophilicity                | S | 8  |
| 404  | 409  | GDEVRYQ                             | 0.6701  | Parker hydrophilicity                | S | 6  |
| 411  | 425  | APGQTGKIADYNYKL                     | 1.4441  | Parker hydrophilicity                | S | 15 |
| 437  | 449  | NSNNLDSKVGGNY                       | 0.6657  | Parker hydrophilicity                | S | 13 |
| 464  | 470  | FERDIST                             | -1.2261 | Parker hydrophilicity                | S | 7  |
| 472  | 485  | IYQAGSTPCNGVEG                      | -0.0612 | Parker hydrophilicity                | S | 14 |
| 496  | 507  | GFQPTNGVGYQP                        | 0.6299  | Parker hydrophilicity                | S | 12 |
| 522  | 535  | ATVCGPKKSTNLVK                      | 0.0422  | Parker hydrophilicity                | S | 14 |
| 550  | 557  | GVLTESNK                            | 0.7779  | Parker hydrophilicity                | S | 8  |
| 565  | 581  | FRDIADTTDAVRDPQT                    | 0.0859  | Parker hydrophilicity                | S | 17 |
| 599  | 607  | TPGTNTSNQ                           | 0.5029  | Parker hydrophilicity                | S | 9  |
| 614  | 620  | DVNCTEV                             | 2.2015  | Parker hydrophilicity                | S | 7  |
| 637  | 647  | STGSNVFQTRA                         | 0.502   | Parker hydrophilicity                | S | 11 |
| 654  | 662  | EHVNNSEYEC                          | 1.068   | Parker hydrophilicity                | S | 9  |
| 672  | 689  | ASYQTQTNPRRARSVAS                   | 0.2963  | Parker hydrophilicity                | S | 18 |
| 699  | 712  | LGAENSVAYSNNSI                      | 0.608   | Parker hydrophilicity                | S | 14 |
| 731  | 738  | MTKTSVDC                            | 1.5932  | Parker hydrophilicity                | S | 8  |
| 743  | 750  | CGDSTEC                             | 0.0977  | Parker hydrophilicity                | S | 8  |
| 771  | 781  | AVEQDKNTQEV                         | 0.3969  | Parker hydrophilicity                | S | 11 |
| 806  | 814  | LPDPSKPSK                           | -0.1058 | Parker hydrophilicity                | S | 9  |
| 837  | 842  | YGDCLG                              | -0.4941 | Parker hydrophilicity                | S | 6  |
| 926  | 944  | QFNSAIGKIQDLSLSTASA                 | 0.3983  | Parker hydrophilicity                | S | 19 |
| 949  | 958  | QDVVNQNAQA                          | 0.2037  | Parker hydrophilicity                | S | 10 |
| 966  | 972  | LSSNFGA                             | 0.6114  | Parker hydrophilicity                | S | 7  |
| 1033 | 1046 | VLGQSKRVDFCGKG                      | 1.3582  | Parker hydrophilicity                | S | 14 |
| 1053 | 1058 | PQSAPH                              | 0.141   | Parker hydrophilicity                | S | 6  |
| 1069 | 1077 | PAQEKNFTT                           | 0.382   | Parker hydrophilicity                | S | 9  |
| 1081 | 1091 | ICHDGKAHFPR                         | -0.8542 | Parker hydrophilicity                | S | 11 |
| 1114 | 1128 | IITTDNTFVSGNCDV                     | 0.1092  | Parker hydrophilicity                | S | 15 |
| 1141 | 1154 | LQPELDSFKEELDK                      | -0.7047 | Parker hydrophilicity                | S | 14 |
| 1156 | 1168 | FKNHTSPDVLGD                        | 1.0616  | Parker hydrophilicity                | S | 13 |
| 1187 | 1194 | NEVAKNLN                            | -0.0646 | Parker hydrophilicity                | S | 8  |
| 1238 | 1264 | TSCCSCLKGCCSCGSCCKFDEDDSEPV         | 0.1337  | Parker hydrophilicity                | S | 27 |
| 18   | 32   | LTTRTQLPPAYTNSF                     | 0.79    | Emini surface accessibility          | S | 15 |
| 35   | 43   | GVYYPDKVF                           | 0.0652  | Emini surface accessibility          | S | 9  |
| 73   | 80   | TNGTKRFD                            | 0.2041  | Emini surface accessibility          | S | 8  |
| 110  | 115  | LDSKTQ                              | 1.3071  | Emini surface accessibility          | S | 6  |
| 144  | 153  | YYHKNNKSWM                          | 0.3777  | Emini surface accessibility          | S | 10 |
| 179  | 185  | LEGKQGN                             | 1.8367  | Emini surface accessibility          | S | 7  |
| 202  | 208  | KIYSKHT                             | 0.7773  | Emini surface accessibility          | S | 7  |
| 250  | 255  | TPGDSS                              | 0.3268  | Emini surface accessibility          | S | 6  |
| 278  | 284  | KYNEGT                              | 0.9414  | Emini surface accessibility          | S | 7  |
| 314  | 323  | QTSNFRVQPT                          | 1.405   | Emini surface accessibility          | S | 10 |
| 352  | 357  | AWNRRK                              | 1.632   | Emini surface accessibility          | S | 6  |
| 419  | 428  | ADYNYKLPPD                          | 0.6956  | Emini surface accessibility          | S | 10 |
| 437  | 442  | NSNNLD                              | 1.1859  | Emini surface accessibility          | S | 6  |
| 455  | 468  | LFRKSNLKPFERDI                      | 0.361   | Emini surface accessibility          | S | 14 |
| 495  | 500  | YGFQPT                              | 1.6231  | Emini surface accessibility          | S | 6  |
| 569  | 581  | IADTTDAVRDPQT                       | 0.3018  | Emini surface accessibility          | S | 13 |
| 601  | 606  | GTNTSN                              | 1.2831  | Emini surface accessibility          | S | 6  |
| 627  | 636  | DQLTPTWRVY                          | 0.6489  | Emini surface accessibility          | S | 10 |
| 655  | 660  | HVNNSY                              | 1.0629  | Emini surface accessibility          | S | 6  |
| 674  | 685  | YQTQTNPRRAR                         | 0.076   | Emini surface accessibility          | S | 12 |
| 773  | 779  | EQDKNTQ                             | 0.1017  | Emini surface accessibility          | S | 7  |
| 786  | 794  | KQIYKTPPI                           | 0.2705  | Emini surface accessibility          | S | 9  |
| 808  | 817  | DPSKPSKRSF                          | 0.8148  | Emini surface accessibility          | S | 10 |
| 914  | 920  | NVLYENQ                             | 0.4689  | Emini surface accessibility          | S | 7  |
| 1068 | 1076 | VPAQEKNFT                           | 1.0107  | Emini surface accessibility          | S | 9  |
| 1105 | 1111 | TQRNFYE                             | 0.219   | Emini surface accessibility          | S | 7  |
| 1139 | 1162 | DPLQPELDSFKEELDKYFKNHTSP            | -0.3378 | Emini surface accessibility          | S | 24 |
| 1179 | 1186 | IQKEIDRL                            | -1.0253 | Emini surface accessibility          | S | 8  |
| 1202 | 1210 | ELGKYEQYI                           | 0.5415  | Emini surface accessibility          | S | 9  |
| 1256 | 1261 | FDEDDS                              | -0.0685 | Emini surface accessibility          | S | 6  |
| 23   | 34   | QLPPAYTNSFTR                        | -0.0689 | Chou and Fasman beta turn            | S | 12 |
| 36   | 43   | VYYPDKVF                            | 0.0301  | Chou and Fasman beta turn            | S | 8  |
| 71   | 91   | SGTNGTKRFDNPVLPFNDGVY               | 0.3544  | Chou and Fasman beta turn            | S | 21 |
| 109  | 115  | TLDSKTQ                             | 1.2584  | Chou and Fasman beta turn            | S | 7  |
| 135  | 142  | FCNDPFLG                            | 0.1982  | Chou and Fasman beta turn            | S | 8  |
| 145  | 152  | YHKNNKSW                            | 0.4099  | Chou and Fasman beta turn            | S | 8  |
| 161  | 167  | SSANNCT                             | -0.4197 | Chou and Fasman beta turn            | S | 7  |
| 181  | 188  | GKQGNFKN                            | 1.0999  | Chou and Fasman beta turn            | S | 8  |
| 248  | 260  | YLTPGDSSSGWTA                       | 0.627   | Chou and Fasman beta turn            | S | 13 |
| 279  | 285  | YNENGTI                             | 0.508   | Chou and Fasman beta turn            | S | 7  |
| 292  | 298  | ALDPLSE                             | 0.5276  | Chou and Fasman beta turn            | S | 7  |

|      |      |                                            |         |                                |   |    |
|------|------|--------------------------------------------|---------|--------------------------------|---|----|
| 313  | 320  | YQTSNFRV                                   | 0.371   | Chou and Fasman beta turn      | S | 8  |
| 367  | 374  | VLNSASF                                    | 0.1765  | Chou and Fasman beta turn      | S | 8  |
| 380  | 389  | YGVSPTKLND                                 | 1.4531  | Chou and Fasman beta turn      | S | 10 |
| 411  | 430  | APGQTGKIADYNYKLPDDFT                       | 1.0425  | Chou and Fasman beta turn      | S | 20 |
| 436  | 452  | WNSNNLDSKVGGNYYNL                          | 0.8074  | Chou and Fasman beta turn      | S | 17 |
| 474  | 507  | QAGSTPCNGVEGFNCYFPLQSYGFQPTNGVGYQP         | 0.5024  | Chou and Fasman beta turn      | S | 34 |
| 523  | 535  | TVCGPKKSTNLVK                              | 0.0426  | Chou and Fasman beta turn      | S | 13 |
| 537  | 548  | KCVNFFNGLTG                                | 1.6969  | Chou and Fasman beta turn      | S | 12 |
| 588  | 594  | TPCSFGG                                    | 1.6632  | Chou and Fasman beta turn      | S | 7  |
| 599  | 606  | TPGTNTSN                                   | 0.5249  | Chou and Fasman beta turn      | S | 8  |
| 636  | 643  | YSTGSNVF                                   | -0.1992 | Chou and Fasman beta turn      | S | 8  |
| 655  | 666  | HVNNSYECDIPI                               | 0.6752  | Chou and Fasman beta turn      | S | 12 |
| 674  | 683  | YQTQTNsprR                                 | -0.2647 | Chou and Fasman beta turn      | S | 10 |
| 705  | 714  | VAYSNSIAI                                  | 1.0545  | Chou and Fasman beta turn      | S | 10 |
| 740  | 750  | MYICGDSSTECs                               | -0.3346 | Chou and Fasman beta turn      | S | 11 |
| 789  | 802  | YKTPPIKDFGGFNF                             | 0.2117  | Chou and Fasman beta turn      | S | 14 |
| 804  | 815  | QILPDPSPKSKR                               | 0.2594  | Chou and Fasman beta turn      | S | 12 |
| 835  | 842  | KQYGDCLG                                   | 0.4129  | Chou and Fasman beta turn      | S | 8  |
| 926  | 931  | QFNsAI                                     | -0.1194 | Chou and Fasman beta turn      | S | 6  |
| 934  | 943  | IQDSLSTAS                                  | 0.4491  | Chou and Fasman beta turn      | S | 10 |
| 966  | 972  | LSSNFGA                                    | 0.6114  | Chou and Fasman beta turn      | S | 7  |
| 1033 | 1038 | VLGQSK                                     | 1.2255  | Chou and Fasman beta turn      | S | 6  |
| 1040 | 1048 | VDfCGKGYH                                  | 0.375   | Chou and Fasman beta turn      | S | 9  |
| 1052 | 1058 | FPQsAPH                                    | -0.3069 | Chou and Fasman beta turn      | S | 7  |
| 1082 | 1088 | CHDGKAH                                    | -0.2298 | Chou and Fasman beta turn      | S | 7  |
| 1096 | 1101 | VSNGTH                                     | 0.7888  | Chou and Fasman beta turn      | S | 6  |
| 1119 | 1128 | NTFVSGNCDV                                 | -0.5646 | Chou and Fasman beta turn      | S | 10 |
| 1136 | 1146 | TVYDPLQPELD                                | 0.3454  | Chou and Fasman beta turn      | S | 11 |
| 1155 | 1173 | YfKNHTSPDVLGDISGIN                         | 0.88    | Chou and Fasman beta turn      | S | 19 |
| 1237 | 1264 | MTSCCCLKGCCSCGCKFDEDDSEPV                  | 0.1043  | Chou and Fasman beta turn      | S | 28 |
| 19   | 34   | TTRTQLPPAYTNSFTR                           | 0.3477  | Karplus and Schulz flexibility | S | 16 |
| 39   | 47   | PDkVFRSSV                                  | -0.7314 | Karplus and Schulz flexibility | S | 9  |
| 49   | 54   | HSTQDL                                     | 0.4956  | Karplus and Schulz flexibility | S | 6  |
| 71   | 83   | SGTNGTKRFDNPV                              | 0.3648  | Karplus and Schulz flexibility | S | 13 |
| 94   | 99   | STeKSN                                     | 1.0006  | Karplus and Schulz flexibility | S | 6  |
| 108  | 116  | TTLDSKTQS                                  | 1.0106  | Karplus and Schulz flexibility | S | 9  |
| 147  | 152  | KNNKSW                                     | 0.4346  | Karplus and Schulz flexibility | S | 6  |
| 180  | 190  | EGKQGNfKNLr                                | 1.0042  | Karplus and Schulz flexibility | S | 11 |
| 205  | 210  | SKHTPI                                     | 0.7317  | Karplus and Schulz flexibility | S | 6  |
| 214  | 220  | RDLpQGF                                    | 1.1398  | Karplus and Schulz flexibility | S | 7  |
| 248  | 258  | YLTPGDSSSGW                                | 0.624   | Karplus and Schulz flexibility | S | 11 |
| 279  | 287  | YNENGtTD                                   | 0.765   | Karplus and Schulz flexibility | S | 9  |
| 294  | 305  | DPLSETKCTLKS                               | 0.9204  | Karplus and Schulz flexibility | S | 12 |
| 383  | 389  | SPTKLND                                    | 0.839   | Karplus and Schulz flexibility | S | 7  |
| 403  | 408  | RGDEVR                                     | -2.2527 | Karplus and Schulz flexibility | S | 6  |
| 411  | 417  | APGQTGK                                    | 1.7614  | Karplus and Schulz flexibility | S | 7  |
| 424  | 430  | KLpDDFT                                    | -0.051  | Karplus and Schulz flexibility | S | 7  |
| 437  | 448  | NSNNLDSKVGGN                               | 0.6962  | Karplus and Schulz flexibility | S | 12 |
| 457  | 471  | RKSNLkPFERDISTE                            | 0.4847  | Karplus and Schulz flexibility | S | 15 |
| 475  | 484  | AGSTPCNGVE                                 | 0.0244  | Karplus and Schulz flexibility | S | 10 |
| 498  | 503  | QPTNGV                                     | 0.0716  | Karplus and Schulz flexibility | S | 6  |
| 526  | 537  | GPkKSTNLVKNK                               | 0.4692  | Karplus and Schulz flexibility | S | 12 |
| 545  | 558  | GLTGTGVLtESNKK                             | 1.0227  | Karplus and Schulz flexibility | S | 14 |
| 564  | 582  | QfGRDIADTTDAVRDPQTL                        | 0.1344  | Karplus and Schulz flexibility | S | 19 |
| 599  | 607  | TPGTNTSNQ                                  | 0.5029  | Karplus and Schulz flexibility | S | 9  |
| 614  | 619  | DVNCTE                                     | 2.375   | Karplus and Schulz flexibility | S | 6  |
| 627  | 632  | DQLTPT                                     | 0.7329  | Karplus and Schulz flexibility | S | 6  |
| 637  | 642  | STGSNV                                     | 0.3608  | Karplus and Schulz flexibility | S | 6  |
| 675  | 691  | QTQTNsprRARSVASQS                          | 0.1698  | Karplus and Schulz flexibility | S | 17 |
| 744  | 750  | GDSSTECs                                   | 0.111   | Karplus and Schulz flexibility | S | 7  |
| 773  | 780  | EQDKNTQE                                   | 0.0364  | Karplus and Schulz flexibility | S | 8  |
| 789  | 798  | YKTPPIKDFG                                 | 0.02    | Karplus and Schulz flexibility | S | 10 |
| 806  | 816  | LPDPSPKSKRS                                | 0.5972  | Karplus and Schulz flexibility | S | 11 |
| 836  | 841  | QYGDCL                                     | 0.1281  | Karplus and Schulz flexibility | S | 6  |
| 880  | 885  | GTITSG                                     | -0.0576 | Karplus and Schulz flexibility | S | 6  |
| 932  | 943  | GKIQDSLSTAS                                | 0.5659  | Karplus and Schulz flexibility | S | 12 |
| 946  | 956  | GKLQDVVNQNA                                | 0.3966  | Karplus and Schulz flexibility | S | 11 |
| 961  | 969  | TLVKQLSSN                                  | -0.5178 | Karplus and Schulz flexibility | S | 9  |
| 982  | 988  | SRLDKVE                                    | 0.0966  | Karplus and Schulz flexibility | S | 7  |
| 994  | 1011 | DRLITGRLQSLQTYVTQQ                         | -0.2656 | Karplus and Schulz flexibility | S | 18 |
| 1034 | 1039 | LGQSKR                                     | 2.0011  | Karplus and Schulz flexibility | S | 6  |
| 1070 | 1078 | AQEKNFtTA                                  | 0.7576  | Karplus and Schulz flexibility | S | 9  |
| 1116 | 1125 | TTDNtFVSGN                                 | 0.3035  | Karplus and Schulz flexibility | S | 10 |
| 1134 | 1172 | NNTVYDPLQPELDSfKEELDKYfKNHTSPDVLGDISGI     | 0.1406  | Karplus and Schulz flexibility | S | 39 |
| 1179 | 1187 | IQKEIDRLN                                  | -0.4173 | Karplus and Schulz flexibility | S | 9  |
| 1191 | 1196 | KNLNEs                                     | 0.863   | Karplus and Schulz flexibility | S | 6  |
| 1202 | 1207 | ELGKYE                                     | 0.4595  | Karplus and Schulz flexibility | S | 6  |
| 1256 | 1269 | fEEDDSEPVlKGVK                             | 0.6734  | Karplus and Schulz flexibility | S | 14 |
| 1    | 8    | MADsNGTI                                   | 0.0793  | Bepipred                       | M | 8  |
| 185  | 194  | QRVAGDSGfA                                 | 0.198   | Bepipred                       | M | 10 |
| 206  | 215  | LNTDHSSSD                                  | 0.2535  | Bepipred                       | M | 10 |
| 4    | 19   | NGTITVEELKkLEQW                            | -0.1969 | Bepipred2                      | M | 16 |
| 131  | 136  | PLLESE                                     | 0.8069  | Bepipred2                      | M | 6  |
| 179  | 190  | KLgASQRVAGDS                               | 0.0439  | Bepipred2                      | M | 12 |
| 198  | 217  | YRIGNYKLNTDHSSSDNIA                        | 0.2216  | Bepipred2                      | M | 20 |
| 39   | 44   | YANRRR                                     | 0.342   | Chou                           | M | 6  |
| 107  | 118  | RSMWfSNPETNI                               | 0.5882  | Chou                           | M | 12 |
| 154  | 166  | HHLGRCDIKLpK                               | 0.3852  | Chou                           | M | 13 |
| 174  | 217  | RTLsYKLGASQRVAGDSGfAAYSRYRIGNYKLNTDHSSSDNI | 0.3707  | Chou                           | M | 44 |
| 11   | 20   | EELKkLEQW                                  | -1.3465 | Emini                          | M | 10 |
| 38   | 44   | AYANRRR                                    | 0.674   | Emini                          | M | 7  |
| 103  | 109  | FARTRSM                                    | 0.5616  | Emini                          | M | 7  |
| 162  | 167  | KDLpKE                                     | -1.1446 | Emini                          | M | 6  |

|     |     |                                      |        |          |   |    |
|-----|-----|--------------------------------------|--------|----------|---|----|
| 171 | 188 | ATSRTLZYKLGASQRVA                    | 0.6107 | Emini    | M | 18 |
| 195 | 202 | AYSRYRIG                             | 0.5894 | Emini    | M | 8  |
| 204 | 215 | YKLNTDHSSSD                          | 0.0168 | Emini    | M | 12 |
| 4   | 19  | SNGTITVEELKLEQ                       | 0.0264 | Karplus  | M | 16 |
| 124 | 138 | LHGTLRPLESEL                         | 0.1462 | Karplus  | M | 15 |
| 157 | 176 | GRCDIKLPKEITVATSRTL                  | 0.6445 | Karplus  | M | 20 |
| 180 | 193 | KLGASQRVAGDSGF                       | 0.3608 | Karplus  | M | 14 |
| 197 | 216 | SRYRIGNYKLNTHSSSDN                   | 0.1004 | Karplus  | M | 20 |
| 29  | 38  | LTWICLLQFA                           | 1.0412 | Kolaskar | M | 10 |
| 46  | 71  | LYIIKLIFLWLLWPVTLACFVLAAYV           | 0.7033 | Kolaskar | M | 26 |
| 83  | 91  | AMACLVGLM                            | 0.6251 | Kolaskar | M | 9  |
| 93  | 101 | LSYFIASFR                            | 0.3283 | Kolaskar | M | 9  |
| 135 | 148 | ESELVIGAVILRGH                       | 0.6733 | Kolaskar | M | 14 |
| 4   | 18  | SNGTITVEELKLE                        | 0.1513 | Parker   | M | 15 |
| 38  | 44  | AYANRNR                              | 0.674  | Parker   | M | 7  |
| 104 | 116 | ARTRSMWFSNPET                        | 1.0549 | Parker   | M | 13 |
| 149 | 177 | LRIAGHHLGRCDIKLPKEITVATSRTL          | 0.3861 | Parker   | M | 29 |
| 180 | 217 | KLGASQRVAGDSGFAAYSRYRIGNYKLNTHSSSDNI | 0.3675 | Parker   | M | 38 |

**Supplementary Table 3B. B-cell epitopes predicted by BCEPRED with antigenicity evaluated by VaxiJen.**

| start | end  | peptide                          | vaxijen | method               | Protein | Peptide Length |
|-------|------|----------------------------------|---------|----------------------|---------|----------------|
| 17    | 47   | NLTTRTQLPPAYTNSFTRGVVYDPDKVFRSS  | 0.3475  | Accessibility        | S       | 31             |
| 71    | 84   | SGTNGTKRFDNPV                    | 0.3648  | Accessibility        | S       | 14             |
| 91    | 103  | YFASTEKSNIR                      | -0.0942 | Accessibility        | S       | 13             |
| 108   | 118  | TLDSKTQSL                        | 0.99    | Accessibility        | S       | 11             |
| 142   | 161  | GVVYHKNNKSWMESEFRVY              | 0.4302  | Accessibility        | S       | 20             |
| 177   | 193  | MDLEGGKQGNFKNREF                 | 0.8263  | Accessibility        | S       | 17             |
| 200   | 212  | YFKIYSKHTPIN                     | 0.7893  | Accessibility        | S       | 13             |
| 268   | 285  | GYLQPRTFLLKYNENGT                | 0.4239  | Accessibility        | S       | 18             |
| 294   | 326  | DPLSETKCTLKSFTVEKGIYQTSNFRVQPTES | 0.6225  | Accessibility        | S       | 33             |
| 350   | 362  | VYAWNRKRISNC                     | 0.3253  | Accessibility        | S       | 13             |
| 383   | 391  | SPTKLNLDL                        | 1.0358  | Accessibility        | S       | 9              |
| 417   | 431  | KIADYNYKLPDDFT                   | 0.9567  | Accessibility        | S       | 15             |
| 437   | 446  | NSNNLDSKV                        | 0.6019  | Accessibility        | S       | 10             |
| 447   | 472  | GNYNYLYRFLFRKSNLKPFFERDISTE      | 0.1595  | Accessibility        | S       | 26             |
| 503   | 512  | VGYPYRVV                         | 1.4383  | Accessibility        | S       | 10             |
| 525   | 538  | CGPKKSTNLVKNK                    | 0.1411  | Accessibility        | S       | 14             |
| 552   | 562  | LTESNKKFLP                       | 0.6681  | Accessibility        | S       | 11             |
| 573   | 584  | TDVAVRDPQTLE                     | 0.2349  | Accessibility        | S       | 12             |
| 599   | 609  | TPGTNTSNQV                       | 0.4224  | Accessibility        | S       | 11             |
| 654   | 664  | EHVNNSEYED                       | 0.827   | Accessibility        | S       | 11             |
| 672   | 689  | ASYQTQTNsprrarsva                | 0.3628  | Accessibility        | S       | 18             |
| 771   | 783  | AVEQDKNTQEVF                     | 0.2192  | Accessibility        | S       | 13             |
| 806   | 821  | LPDPSKPSKRSEFIED                 | 0.0476  | Accessibility        | S       | 16             |
| 913   | 924  | QNVLYENQKLI                      | 0.2774  | Accessibility        | S       | 12             |
| 982   | 990  | SRLDKVEA                         | 0.1615  | Accessibility        | S       | 9              |
| 1000  | 1012 | RLQSLQTYVTQQ                     | 0.1103  | Accessibility        | S       | 13             |
| 1035  | 1043 | GQSKRVDF                         | 1.9298  | Accessibility        | S       | 9              |
| 1067  | 1080 | YVPAQEKNFITAP                    | 0.6578  | Accessibility        | S       | 14             |
| 1104  | 1114 | VTQRNFYEPQ                       | 0.6509  | Accessibility        | S       | 11             |
| 1134  | 1164 | NNTVYDPLQPELDSFKEELDKYFKNHTSPD   | -0.2097 | Accessibility        | S       | 31             |
| 1178  | 1198 | NIQKEIDRLNEVAKNLES               | -0.0099 | Accessibility        | S       | 21             |
| 1201  | 1214 | QELGKYEQYIKWP                    | 0.3709  | Accessibility        | S       | 14             |
| 1254  | 1265 | CKFDEDDSEPV                      | 0.2159  | Accessibility        | S       | 12             |
| 1     | 21   | MFVFLVLLPLVSSQCVNLT              | 0.8317  | Antigenic_Propensity | S       | 21             |
| 36    | 63   | VYYPDKVFRSSVLHSTQDLFLPFFSNV      | 0.0327  | Antigenic_Propensity | S       | 28             |
| 114   | 122  | TQSLLVN                          | 0.6517  | Antigenic_Propensity | S       | 9              |
| 124   | 148  | TNVVIKVCQFCQNDPFLGVYYHK          | 0.072   | Antigenic_Propensity | S       | 25             |
| 166   | 178  | CTFEYVSQPFLM                     | 0.2955  | Antigenic_Propensity | S       | 13             |
| 207   | 219  | HTPINLVRDLQP                     | -0.1335 | Antigenic_Propensity | S       | 13             |
| 223   | 234  | LEPLVDLPIGI                      | 0.8222  | Antigenic_Propensity | S       | 12             |
| 265   | 274  | YYVGYLQPR                        | 1.4692  | Antigenic_Propensity | S       | 10             |
| 332   | 343  | ITNLCPFGEVF                      | 0.3094  | Antigenic_Propensity | S       | 12             |
| 364   | 372  | DYSVLVNS                         | 0.1757  | Antigenic_Propensity | S       | 9              |
| 374   | 386  | FSTFKCYGVSPT                     | 0.8097  | Antigenic_Propensity | S       | 13             |
| 389   | 397  | DLCFTNVY                         | 1.8569  | Antigenic_Propensity | S       | 9              |
| 449   | 458  | YNYLYRFLR                        | -0.8692 | Antigenic_Propensity | S       | 10             |
| 486   | 496  | FNCYFPLQSY                       | 0.8219  | Antigenic_Propensity | S       | 11             |
| 505   | 520  | YQPYRVVLSFELLH                   | 0.9711  | Antigenic_Propensity | S       | 16             |
| 584   | 602  | ILDITPCSFGGVSVITPG               | 1.1031  | Antigenic_Propensity | S       | 19             |
| 610   | 623  | VLYQDVNCTEVPV                    | 0.619   | Antigenic_Propensity | S       | 14             |
| 736   | 745  | VDCTMYICG                        | -0.7197 | Antigenic_Propensity | S       | 10             |
| 748   | 761  | ECSNLLLYGVSFC                    | 0.8661  | Antigenic_Propensity | S       | 14             |
| 857   | 868  | GLTVLPLLLTD                      | 0.5484  | Antigenic_Propensity | S       | 12             |
| 946   | 955  | GKLQDVVNQ                        | 0.3499  | Antigenic_Propensity | S       | 10             |
| 961   | 969  | TLVKQLSS                         | -0.4822 | Antigenic_Propensity | S       | 9              |
| 975   | 983  | SVLNDILS                         | -0.6172 | Antigenic_Propensity | S       | 9              |
| 1001  | 1014 | LQSLQTYVTQQLI                    | -0.1517 | Antigenic_Propensity | S       | 14             |
| 1028  | 1039 | KMSECVLGQSK                      | 0.1391  | Antigenic_Propensity | S       | 12             |
| 1057  | 1070 | PHGVVFLHVTYVP                    | 0.9305  | Antigenic_Propensity | S       | 14             |
| 1122  | 1135 | VSGNCDVVIGIVN                    | 0.7251  | Antigenic_Propensity | S       | 14             |
| 1136  | 1144 | TVYDPLQP                         | 0.3135  | Antigenic_Propensity | S       | 9              |
| 1227  | 1257 | IVMVTIMLCCMTSCCSCLGKCCSCGSCCKF   | 0.0464  | Antigenic_Propensity | S       | 31             |
| 1262  | 1274 | EPVLKGVKLYHT                     | 1.4118  | Antigenic_Propensity | S       | 13             |
| 144   | 154  | YYHKNNKSWM                       | 0.3777  | Exposed_Surface      | S       | 11             |
| 351   | 361  | YAWNRKRISN                       | 0.5855  | Exposed_Surface      | S       | 11             |
| 456   | 464  | FRKSNLKP                         | 1.1111  | Exposed_Surface      | S       | 9              |
| 526   | 534  | GPKKSTNL                         | 0.7072  | Exposed_Surface      | S       | 9              |
| 552   | 560  | LTESNKKF                         | 0.7708  | Exposed_Surface      | S       | 9              |
| 677   | 686  | QTNSPRRAR                        | -0.118  | Exposed_Surface      | S       | 10             |
| 772   | 782  | VEQDKNTQEV                       | 0.2465  | Exposed_Surface      | S       | 11             |
| 784   | 797  | QVKQIYKTPPIKD                    | 0.3607  | Exposed_Surface      | S       | 14             |
| 808   | 818  | DPSKPSKRSE                       | 0.8148  | Exposed_Surface      | S       | 11             |
| 1148  | 1161 | FKEELDKYFKNHT                    | -0.967  | Exposed_Surface      | S       | 14             |

|      |      |                          |         |                 |   |    |
|------|------|--------------------------|---------|-----------------|---|----|
| 1179 | 1187 | IQKEIDRL                 | -1.0253 | Exposed_Surface | S | 9  |
| 68   | 77   | IHSVSGTNGT               | 0.8621  | Flexibility     | S | 10 |
| 90   | 98   | VYFASTTEK                | 0.9206  | Flexibility     | S | 9  |
| 108  | 116  | TTLDSKTQ                 | 1.0912  | Flexibility     | S | 9  |
| 247  | 256  | SYLTPGDSS                | 0.7324  | Flexibility     | S | 10 |
| 351  | 359  | YAWNRRKRI                | 0.7206  | Flexibility     | S | 9  |
| 439  | 447  | NNLDSKVG                 | 1.2952  | Flexibility     | S | 9  |
| 454  | 462  | RLFRKSNL                 | 0.2128  | Flexibility     | S | 9  |
| 522  | 532  | ATVCGPKKST               | -0.1151 | Flexibility     | S | 11 |
| 550  | 558  | GVLTESNK                 | 0.7779  | Flexibility     | S | 9  |
| 597  | 606  | VITPGTNTS                | 0.2753  | Flexibility     | S | 10 |
| 672  | 685  | ASYQTQTNsprra            | 0.107   | Flexibility     | S | 14 |
| 742  | 750  | ICGDSTEC                 | -0.2546 | Flexibility     | S | 9  |
| 770  | 779  | IAVEQDKNT                | 0.4823  | Flexibility     | S | 10 |
| 804  | 816  | QILPDPSPKSKR             | 0.2594  | Flexibility     | S | 13 |
| 932  | 940  | GKIQDLSL                 | 0.2746  | Flexibility     | S | 9  |
| 1031 | 1040 | ECVLGQSKR                | 0.9377  | Flexibility     | S | 10 |
| 1254 | 1262 | CKFDEDDS                 | -0.1581 | Flexibility     | S | 9  |
| 70   | 79   | VSGTNGTKR                | 0.9855  | Hydrophilicity  | S | 10 |
| 250  | 258  | TPGDSSSG                 | 0.0924  | Hydrophilicity  | S | 9  |
| 278  | 288  | KYNENGTITD               | 0.9589  | Hydrophilicity  | S | 11 |
| 437  | 449  | NSNNLDSKVGGN             | 0.6962  | Hydrophilicity  | S | 13 |
| 525  | 533  | CGPKKSTN                 | -0.2855 | Hydrophilicity  | S | 9  |
| 568  | 579  | DIADTTDAVRD              | 0.8257  | Hydrophilicity  | S | 12 |
| 673  | 685  | SYQTQTNsprra             | 0.0145  | Hydrophilicity  | S | 13 |
| 743  | 752  | CGDSTECN                 | 0.1786  | Hydrophilicity  | S | 10 |
| 771  | 782  | AVEQDKNTQEV              | 0.3969  | Hydrophilicity  | S | 12 |
| 807  | 817  | PDPSKPSKRS               | 0.8374  | Hydrophilicity  | S | 11 |
| 1157 | 1166 | KNHTSPDVD                | 0.7809  | Hydrophilicity  | S | 10 |
| 144  | 161  | YYHKNNKSWMESEFRVY        | 0.3439  | Polarity        | S | 18 |
| 185  | 197  | NFKNLREFVFKN             | 0.1722  | Polarity        | S | 13 |
| 201  | 209  | FKIYSKHT                 | 1.1661  | Polarity        | S | 9  |
| 298  | 311  | ETKCTLSFTVEK             | 0.5711  | Polarity        | S | 14 |
| 351  | 362  | YAWNRRKISNC              | 0.4749  | Polarity        | S | 12 |
| 402  | 410  | IRGDEVQR                 | -0.6918 | Polarity        | S | 9  |
| 452  | 472  | LYRLFRKSNLKPFERDISTE     | -0.0464 | Polarity        | S | 21 |
| 552  | 561  | LTESNKKFL                | 0.3167  | Polarity        | S | 10 |
| 679  | 689  | NSPRRARSVA               | 0.2502  | Polarity        | S | 11 |
| 809  | 821  | PSKPSKRSFIED             | 0.3363  | Polarity        | S | 13 |
| 982  | 993  | SRLDKVEAEVQ              | 0.3878  | Polarity        | S | 12 |
| 1013 | 1021 | IRAAEIRA                 | 0.2791  | Polarity        | S | 9  |
| 1082 | 1095 | CHDGKAHFPREGV            | -0.4141 | Polarity        | S | 14 |
| 1144 | 1161 | ELDSFKEELDKYFKNHT        | -0.8623 | Polarity        | S | 18 |
| 1179 | 1192 | IQKEIDRLNEVAK            | -0.1773 | Polarity        | S | 14 |
| 1201 | 1212 | QELGKYEQYIK              | 0.2086  | Polarity        | S | 12 |
| 1253 | 1265 | CCKFDEDDSEPV             | 0.4603  | Polarity        | S | 13 |
| 134  | 142  | QFCNDPFL                 | -0.243  | Turns           | S | 9  |
| 145  | 153  | YHKNNKSW                 | 0.4099  | Turns           | S | 9  |
| 160  | 169  | YSSANNCTF                | -0.1036 | Turns           | S | 10 |
| 435  | 445  | AWNSNNLDSK               | 1.0198  | Turns           | S | 11 |
| 538  | 547  | CVNFNFNGL                | 1.7985  | Turns           | S | 10 |
| 601  | 609  | GTNTSNQV                 | 0.7179  | Turns           | S | 9  |
| 653  | 662  | AEHVNNSEYE               | 0.8405  | Turns           | S | 10 |
| 706  | 714  | AYSNNNSIA                | 0.5473  | Turns           | S | 9  |
| 1156 | 1164 | FKNHTSPD                 | 0.5003  | Turns           | S | 9  |
| 9    | 20   | TVEELKLLQW               | -0.7598 | Accessibility   | M | 12 |
| 38   | 47   | AYANRRFLY                | 0.1565  | Accessibility   | M | 10 |
| 101  | 117  | RLFARTRSMWSFNPETN        | 0.5366  | Accessibility   | M | 17 |
| 131  | 137  | RPLLESE                  | 0.1952  | Accessibility   | M | 7  |
| 160  | 169  | DIKDLPEIT                | 0.7112  | Accessibility   | M | 10 |
| 172  | 186  | TSRTLSYYKLGASQR          | 0.7675  | Accessibility   | M | 15 |
| 194  | 216  | AAYSRYRIGNYKLNTHSSSSDN   | 0.2438  | Accessibility   | M | 23 |
| 21   | 37   | NLVIGFLFTWICLLQF         | 1.0402  | Antigenic       | M | 17 |
| 44   | 62   | RFLYIIKLIFLWLLWPVTL      | 0.5893  | Antigenic       | M | 19 |
| 86   | 93   | CLVGLMWL                 | 0.8376  | Antigenic       | M | 8  |
| 117  | 140  | NILLNVPLHGTLTRPPLLESELVI | -0.0316 | Antigenic       | M | 24 |
| 143  | 149  | VILRGHL                  | -0.2078 | Antigenic       | M | 7  |
| 175  | 182  | TLSYYKLG                 | 0.9387  | Antigenic       | M | 8  |
| 9    | 15   | TVEELKK                  | 0.2727  | Exposed         | M | 7  |
| 160  | 168  | DIKDLPEI                 | 0.5528  | Exposed         | M | 9  |
| 169  | 175  | TVATSRT                  | 0.7772  | Flexibility     | M | 7  |
| 204  | 215  | YKLNTHSSSSD              | 0.0168  | Flexibility     | M | 12 |
| 1    | 9    | MADNSGTIT                | 0.4187  | Hydrophilicity  | M | 9  |
| 207  | 217  | NTDHSSSSDNI              | 0.3291  | Hydrophilicity  | M | 11 |
| 9    | 20   | TVEELKLLQW               | -0.7598 | Polarity        | M | 12 |



|     |     |                          |        |          |   |    |
|-----|-----|--------------------------|--------|----------|---|----|
| 101 | 107 | RLFARTR                  | 0.2275 | Polarity | M | 7  |
| 131 | 137 | RPLLESE                  | 0.1952 | Polarity | M | 7  |
| 144 | 168 | ILRGHLRIAGHHLGRCDIKDPKEI | 0.1626 | Polarity | M | 25 |
| 205 | 218 | KLNTDHSSSSDNIA           | 0.06   | Turns    | M | 14 |

---

Supplementary Table 3C. B-cell epitopes predicted by both IEDB and BCEPRED with antigenicity evaluated by VaxiJen > 0.9.

| start | end  | peptide                   | vaxijen | method                               | server  | Protein | Peptide Length | RBD    | Topology      | Allergenicity | Toxicity     |
|-------|------|---------------------------|---------|--------------------------------------|---------|---------|----------------|--------|---------------|---------------|--------------|
| 108   | 117  | TTLDSKTKQSL               | 0.99    | Accessibility                        | BcePred | S       | 10             | nonRBD | Outside       | Non-Toxin     | NON-ALLERGEN |
| 383   | 390  | SPTKLNLDL                 | 1.0358  | Accessibility                        | BcePred | S       | 8              | RBD    | Outside       | Non-Toxin     | ALLERGEN     |
| 417   | 430  | KIADYNYKLPDDFT            | 0.9567  | Accessibility                        | BcePred | S       | 14             | RBD    | Outside       | Non-Toxin     | NON-ALLERGEN |
| 503   | 511  | VGYPYRVV                  | 1.4383  | Accessibility                        | BcePred | S       | 9              | RBD    | Outside       | Non-Toxin     | ALLERGEN     |
| 1035  | 1042 | GQSKRVDF                  | 1.9298  | Accessibility                        | BcePred | S       | 8              | nonRBD | Outside       | Non-Toxin     | ALLERGEN     |
| 21    | 37   | NLVGFLTWICLQF             | 1.0402  | Antigenic                            | BcePred | M       | 17             | NA     | Transmembrane | Toxin         | NON-ALLERGEN |
| 175   | 182  | TLVYKLG                   | 0.9387  | Antigenic                            | BcePred | M       | 8              | NA     | Inside        | Non-Toxin     | ALLERGEN     |
| 265   | 273  | YYVGYLQPR                 | 1.4692  | Antigenic_Propensity                 | BcePred | S       | 9              | nonRBD | Outside       | Non-Toxin     | NON-ALLERGEN |
| 389   | 396  | DLCTFNVY                  | 1.8569  | Antigenic_Propensity                 | BcePred | S       | 8              | RBD    | Outside       | Non-Toxin     | ALLERGEN     |
| 505   | 519  | YQPYRVVLSFELLH            | 0.9711  | Antigenic_Propensity                 | BcePred | S       | 15             | RBD    | Outside       | Non-Toxin     | NON-ALLERGEN |
| 584   | 601  | ILDITPCSFVGVVITPG         | 1.1031  | Antigenic_Propensity                 | BcePred | S       | 18             | nonRBD | Outside       | Non-Toxin     | NON-ALLERGEN |
| 1057  | 1069 | PHGVVFLHVITYVP            | 0.9305  | Antigenic_Propensity                 | BcePred | S       | 13             | nonRBD | Outside       | Non-Toxin     | ALLERGEN     |
| 1262  | 1273 | EPVLKGVKLYHT              | 1.4118  | Antigenic_Propensity                 | BcePred | S       | 12             | nonRBD | Inside        | Non-Toxin     | NON-ALLERGEN |
| 181   | 186  | GKQGNF                    | 2.1342  | Bepipred                             | IEDB    | S       | 6              | nonRBD | Outside       | Non-Toxin     | ALLERGEN     |
| 282   | 287  | NGTITD                    | 1.1184  | Bepipred                             | IEDB    | S       | 6              | nonRBD | Outside       | Non-Toxin     | ALLERGEN     |
| 318   | 324  | FRVQPT                    | 1.6729  | Bepipred                             | IEDB    | S       | 7              | RBD    | Outside       | Non-Toxin     | ALLERGEN     |
| 407   | 420  | VRQIAPGQTGKIAD            | 1.2606  | Bepipred                             | IEDB    | S       | 14             | RBD    | Outside       | Non-Toxin     | NON-ALLERGEN |
| 1157  | 1167 | KNHTSPDVLG                | 1.4039  | Bepipred                             | IEDB    | S       | 11             | nonRBD | Outside       | Non-Toxin     | NON-ALLERGEN |
| 177   | 189  | MDLEKQGNFKNL              | 1.2592  | Bepipred2.0                          | IEDB    | S       | 13             | nonRBD | Outside       | Non-Toxin     | NON-ALLERGEN |
| 369   | 393  | YNSASFSTFKCYGVSPKLNLDLCFT | 1.4031  | Bepipred2.0                          | IEDB    | S       | 25             | RBD    | Outside       | Non-Toxin     | NON-ALLERGEN |
| 404   | 426  | GDEVRLAPQGTGKIADYNYKLP    | 1.1017  | Bepipred2.0                          | IEDB    | S       | 23             | RBD    | Outside       | Non-Toxin     | NON-ALLERGEN |
| 555   | 562  | SNKKFLPF                  | 1.3952  | Bepipred2.0                          | IEDB    | S       | 8              | nonRBD | Outside       | Non-Toxin     | ALLERGEN     |
| 1035  | 1043 | GQSKRVDFC                 | 1.779   | Bepipred2.0                          | IEDB    | S       | 9              | nonRBD | Outside       | Non-Toxin     | ALLERGEN     |
| 109   | 115  | TLDSKTQ                   | 1.2584  | Chou and Fasman beta turn            | IEDB    | S       | 7              | nonRBD | Outside       | Non-Toxin     | NON-ALLERGEN |
| 181   | 188  | GKQGNFKN                  | 1.0999  | Chou and Fasman beta turn            | IEDB    | S       | 8              | nonRBD | Outside       | Non-Toxin     | ALLERGEN     |
| 380   | 389  | YGVSPKLNLD                | 1.4531  | Chou and Fasman beta turn            | IEDB    | S       | 10             | RBD    | Outside       | Non-Toxin     | NON-ALLERGEN |
| 411   | 430  | APGQTGKIADYNYKLPDDFT      | 1.0425  | Chou and Fasman beta turn            | IEDB    | S       | 20             | RBD    | Outside       | Non-Toxin     | NON-ALLERGEN |
| 537   | 548  | KCVNFNFNGLTG              | 1.6969  | Chou and Fasman beta turn            | IEDB    | S       | 12             | RBD    | Outside       | Non-Toxin     | NON-ALLERGEN |
| 588   | 594  | TPCSFGG                   | 1.6632  | Chou and Fasman beta turn            | IEDB    | S       | 7              | nonRBD | Outside       | Non-Toxin     | ALLERGEN     |
| 705   | 714  | VAYSNNISAI                | 1.0545  | Chou and Fasman beta turn            | IEDB    | S       | 10             | nonRBD | Outside       | Non-Toxin     | NON-ALLERGEN |
| 1033  | 1038 | VLGQSK                    | 1.2255  | Chou and Fasman beta turn            | IEDB    | S       | 6              | nonRBD | Outside       | Non-Toxin     | ALLERGEN     |
| 110   | 115  | LDSKTQ                    | 1.3071  | Emini surface accessibility          | IEDB    | S       | 6              | nonRBD | Outside       | Non-Toxin     | ALLERGEN     |
| 179   | 185  | LEKQGN                    | 1.8367  | Emini surface accessibility          | IEDB    | S       | 7              | nonRBD | Outside       | Non-Toxin     | ALLERGEN     |
| 278   | 284  | KYENGT                    | 0.9414  | Emini surface accessibility          | IEDB    | S       | 7              | nonRBD | Outside       | Non-Toxin     | ALLERGEN     |
| 314   | 323  | QTSNFRVQPT                | 1.405   | Emini surface accessibility          | IEDB    | S       | 10             | RBD    | Outside       | Non-Toxin     | ALLERGEN     |
| 352   | 357  | AWNRRK                    | 1.632   | Emini surface accessibility          | IEDB    | S       | 6              | RBD    | Outside       | Non-Toxin     | ALLERGEN     |
| 437   | 442  | NSNNLD                    | 1.1859  | Emini surface accessibility          | IEDB    | S       | 6              | RBD    | Outside       | Non-Toxin     | ALLERGEN     |
| 495   | 500  | YGFQPT                    | 1.6231  | Emini surface accessibility          | IEDB    | S       | 6              | RBD    | Outside       | Non-Toxin     | ALLERGEN     |
| 601   | 606  | GTNTSN                    | 1.2831  | Emini surface accessibility          | IEDB    | S       | 6              | nonRBD | Outside       | Non-Toxin     | ALLERGEN     |
| 655   | 660  | HVNNSY                    | 1.0629  | Emini surface accessibility          | IEDB    | S       | 6              | nonRBD | Outside       | Non-Toxin     | ALLERGEN     |
| 1068  | 1076 | VPAQEKNT                  | 1.0107  | Emini surface accessibility          | IEDB    | S       | 9              | nonRBD | Outside       | Non-Toxin     | ALLERGEN     |
| 456   | 463  | FRKSNLKP                  | 1.1111  | Exposed_Surface                      | BcePred | S       | 8              | RBD    | Outside       | Non-Toxin     | ALLERGEN     |
| 90    | 97   | VYFASTEK                  | 0.9206  | Flexibility                          | BcePred | S       | 8              | nonRBD | Outside       | Non-Toxin     | NON-ALLERGEN |
| 108   | 115  | TTLDSKTQ                  | 1.0912  | Flexibility                          | BcePred | S       | 8              | nonRBD | Outside       | Non-Toxin     | NON-ALLERGEN |
| 439   | 446  | NNLDSKVG                  | 1.2952  | Flexibility                          | BcePred | S       | 8              | RBD    | Outside       | Non-Toxin     | ALLERGEN     |
| 1031  | 1039 | ECVLGQSKR                 | 0.9377  | Flexibility                          | BcePred | S       | 9              | nonRBD | Outside       | Non-Toxin     | NON-ALLERGEN |
| 70    | 78   | VSGTNGTKR                 | 0.9855  | Hydrophilicity                       | BcePred | S       | 9              | nonRBD | Outside       | Non-Toxin     | NON-ALLERGEN |
| 278   | 287  | KYENGTITD                 | 0.9589  | Hydrophilicity                       | BcePred | S       | 10             | nonRBD | Outside       | Non-Toxin     | NON-ALLERGEN |
| 94    | 99   | STESKN                    | 1.0006  | Karplus and Schulz flexibility       | IEDB    | S       | 6              | nonRBD | Outside       | Non-Toxin     | ALLERGEN     |
| 108   | 116  | TTLDSKTQS                 | 1.0106  | Karplus and Schulz flexibility       | IEDB    | S       | 9              | nonRBD | Outside       | Non-Toxin     | NON-ALLERGEN |
| 180   | 190  | EKGQGNFKNLR               | 1.0042  | Karplus and Schulz flexibility       | IEDB    | S       | 11             | nonRBD | Outside       | Non-Toxin     | ALLERGEN     |
| 214   | 220  | RDLPGF                    | 1.1398  | Karplus and Schulz flexibility       | IEDB    | S       | 7              | nonRBD | Outside       | Non-Toxin     | ALLERGEN     |
| 294   | 305  | DPLSETKCTLKS              | 0.9204  | Karplus and Schulz flexibility       | IEDB    | S       | 12             | nonRBD | Outside       | Non-Toxin     | NON-ALLERGEN |
| 411   | 417  | APGQTGK                   | 1.7614  | Karplus and Schulz flexibility       | IEDB    | S       | 7              | RBD    | Outside       | Non-Toxin     | ALLERGEN     |
| 545   | 558  | GLTGTGVLTESNKK            | 1.0227  | Karplus and Schulz flexibility       | IEDB    | S       | 14             | nonRBD | Outside       | Non-Toxin     | NON-ALLERGEN |
| 614   | 619  | DVNCTE                    | 2.375   | Karplus and Schulz flexibility       | IEDB    | S       | 6              | nonRBD | Outside       | Non-Toxin     | ALLERGEN     |
| 1034  | 1039 | LGQSKR                    | 2.0011  | Karplus and Schulz flexibility       | IEDB    | S       | 6              | nonRBD | Outside       | Non-Toxin     | ALLERGEN     |
| 29    | 38   | LTWICLQFA                 | 1.0412  | Kolaskar                             | IEDB    | M       | 10             | NA     | Transmembrane | Non-Toxin     | ALLERGEN     |
| 34    | 41   | RGVYYPDK                  | 1.0191  | Kolaskar and Tongaonkar antigenicity | IEDB    | S       | 8              | nonRBD | Outside       | Non-Toxin     | NON-ALLERGEN |
| 65    | 70   | FHAHV                     | 1.6766  | Kolaskar and Tongaonkar antigenicity | IEDB    | S       | 6              | nonRBD | Outside       | Non-Toxin     | NON-ALLERGEN |
| 168   | 174  | FEYVSQP                   | 0.9073  | Kolaskar and Tongaonkar antigenicity | IEDB    | S       | 7              | nonRBD | Outside       | Non-Toxin     | ALLERGEN     |
| 333   | 339  | TNLCPPG                   | 1.1812  | Kolaskar and Tongaonkar antigenicity | IEDB    | S       | 7              | RBD    | Outside       | Non-Toxin     | NON-ALLERGEN |
| 376   | 385  | TFKCYGVSP                 | 1.5059  | Kolaskar and Tongaonkar antigenicity | IEDB    | S       | 10             | RBD    | Outside       | Non-Toxin     | ALLERGEN     |
| 488   | 495  | CYFPLQSY                  | 0.9394  | Kolaskar and Tongaonkar antigenicity | IEDB    | S       | 8              | RBD    | Outside       | Non-Toxin     | ALLERGEN     |
| 723   | 730  | TTEILPVS                  | 1.2071  | Kolaskar and Tongaonkar antigenicity | IEDB    | S       | 8              | nonRBD | Outside       | Non-Toxin     | ALLERGEN     |
| 735   | 741  | SVDCTMY                   | 1.0932  | Kolaskar and Tongaonkar antigenicity | IEDB    | S       | 7              | nonRBD | Outside       | Non-Toxin     | ALLERGEN     |
| 847   | 853  | RDLICAQ                   | 1.1443  | Kolaskar and Tongaonkar antigenicity | IEDB    | S       | 7              | nonRBD | Outside       | Non-Toxin     | ALLERGEN     |
| 1262  | 1270 | EPVLKGVK                  | 1.2301  | Kolaskar and Tongaonkar antigenicity | IEDB    | S       | 9              | nonRBD | Inside        | Non-Toxin     | NON-ALLERGEN |
| 104   | 116  | ARTRSMVSNFET              | 1.0549  | Parker                               | IEDB    | M       | 13             | NA     | Inside        | Non-Toxin     | NON-ALLERGEN |
| 14    | 20   | QCVNLT                    | 1.5916  | Parker hydrophilicity                | IEDB    | S       | 7              | nonRBD | Outside       | Non-Toxin     | ALLERGEN     |
| 109   | 115  | TLDSKTQ                   | 1.2584  | Parker hydrophilicity                | IEDB    | S       | 7              | nonRBD | Outside       | Non-Toxin     | NON-ALLERGEN |
| 180   | 188  | EGRQGNFKN                 | 1.1232  | Parker hydrophilicity                | IEDB    | S       | 9              | nonRBD | Outside       | Non-Toxin     | NON-ALLERGEN |
| 295   | 302  | PLETKCT                   | 1.2573  | Parker hydrophilicity                | IEDB    | S       | 8              | nonRBD | Outside       | Non-Toxin     | NON-ALLERGEN |
| 316   | 325  | SNFRVQPTES                | 1.2078  | Parker hydrophilicity                | IEDB    | S       | 10             | RBD    | Outside       | Non-Toxin     | ALLERGEN     |
| 381   | 388  | GVSPITLN                  | 1.9197  | Parker hydrophilicity                | IEDB    | S       | 8              | RBD    | Outside       | Non-Toxin     | ALLERGEN     |
| 411   | 425  | APGQTGKIADYNYKL           | 1.4441  | Parker hydrophilicity                | IEDB    | S       | 15             | RBD    | Outside       | Non-Toxin     | NON-ALLERGEN |
| 614   | 620  | DVNCTEV                   | 2.2015  | Parker hydrophilicity                | IEDB    | S       | 7              | nonRBD | Outside       | Non-Toxin     | NON-ALLERGEN |
| 654   | 662  | EHVNNSYEC                 | 1.068   | Parker hydrophilicity                | IEDB    | S       | 9              | nonRBD | Outside       | Non-Toxin     | NON-ALLERGEN |
| 731   | 738  | MTKTSVDC                  | 1.5932  | Parker hydrophilicity                | IEDB    | S       | 8              | nonRBD | Outside       | Non-Toxin     | ALLERGEN     |
| 1033  | 1046 | VLGQSKRVDFCGKG            | 1.3582  | Parker hydrophilicity                | IEDB    | S       | 14             | nonRBD | Outside       | Non-Toxin     | NON-ALLERGEN |
| 1156  | 1168 | FKNHTSPDVLG               | 1.0616  | Parker hydrophilicity                | IEDB    | S       | 13             | nonRBD | Outside       | Non-Toxin     | NON-ALLERGEN |
| 201   | 208  | FKYSKHT                   | 1.1661  | Polarity                             | BcePred | S       | 8              | nonRBD | Outside       | Non-Toxin     | ALLERGEN     |
| 435   | 444  | AWNSNNLDSK                | 1.0198  | Turns                                | BcePred | S       | 10             | RBD    | Outside       | Non-Toxin     | ALLERGEN     |
| 538   | 546  | CVNFNFNGL                 | 1.7985  | Turns                                | BcePred | S       | 9              | RBD    | Outside       | Non-Toxin     | ALLERGEN     |

**Supplementary Table 3D. Antigenicity score of predicted B-cell epitopes curated from literature.**

| start | end  | protein          | peptide                                                                  | reference                                   | vaxijen |
|-------|------|------------------|--------------------------------------------------------------------------|---------------------------------------------|---------|
| 524   | 598  | S                | VCGPKKSTNLVKNKCVNFNGLTGTGVLTESNKKFLPQQFGRDIADTTDAVRDPQTLEILDITPCSFGGVSVI | Grifoni A. et al. Cell Host & Microbe, 2020 | 0.7634  |
| 888   | 909  | S                | FGAGAALQIPFAMQMAYRFNGI                                                   | Grifoni A. et al. Cell Host & Microbe, 2020 | 0.76    |
| 132   | 151  | M                | PLLESELVIGAVILRGHLRI                                                     | Grifoni A. et al. Cell Host & Microbe, 2020 | 0.6678  |
| 601   | 640  | S                | GTNTSNQVAVLYQDVNCTEVPVAIHADQLTPTWRVYSTGS                                 | Grifoni A. et al. Cell Host & Microbe, 2020 | 0.6197  |
| 355   | 401  | N                | NKHIDAYKTFPPTEPKDKKKKTDEAQLPQRQKQPTVTLPAADM                              | Grifoni A. et al. Cell Host & Microbe, 2020 | 0.525   |
| 287   | 317  | S                | DAVDCALDPLSETKCLKSFTVEKGIYQTSN                                           | Grifoni A. et al. Cell Host & Microbe, 2020 | 0.5013  |
| 42    | 62   | N                | RPQGLPNNTASWFTALTQHKG                                                    | Grifoni A. et al. Cell Host & Microbe, 2020 | 0.3821  |
| 1     | 24   | M                | MADSNGTITVEELKKLLEQWNLVI                                                 | Grifoni A. et al. Cell Host & Microbe, 2020 | 0.1533  |
| 153   | 172  | N                | NNNAATVLQLPQGTTLPKGF                                                     | Grifoni A. et al. Cell Host & Microbe, 2020 | 0.1411  |
| 802   | 819  | S                | FSQILPDPSPKRSFIE                                                         | Grifoni A. et al. Cell Host & Microbe, 2020 | 0.0988  |
| 17    | 28   | ORF3a            | QGEIKDATPSDF                                                             | Srivastava S, et al, Biorxiv,2020           | 1.1542  |
| 71    | 96   | ORF7a            | VKHVYQLRARSVSPKLFIRQEEVQEL                                               | Srivastava S, et al, Biorxiv,2020           | 0.6123  |
| 226   | 267  | N protein        | RLNQLESKMSGKQQGQQTVTKKSAAEASKKPRKRTATKA                                  | Srivastava S, et al, Biorxiv,2020           | 0.5627  |
| 329   | 363  | S                | FPNITNLCPFGEVFNATRFASVYAWNRRKRSNCVA                                      | Srivastava S, et al, Biorxiv,2020           | 0.4466  |
| 23    | 45   | ORF8             | QSCTQHQPYYVDDPCPIHFYSKW                                                  | Srivastava S, et al, Biorxiv,2020           | 0.4371  |
| 440   | 501  | S                | NLDSKVGGNYYLYRLFRKSNLKPFERDISTEIQAGSTPCNGVEGFNCYFPLQSYGFQPTN             | Srivastava S, et al, Biorxiv,2020           | 0.3951  |
| 48    | 56   | ORF8             | RVGARKSAP                                                                | Srivastava S, et al, Biorxiv,2020           | 0.3698  |
| 4157  | 4176 | ORF1ab           | GTTQACTDDNALAYYNTTK                                                      | Srivastava S, et al, Biorxiv,2020           | 0.3601  |
| 159   | 164  | ORF3a            | PYNSVT                                                                   | Srivastava S, et al, Biorxiv,2020           | 0.3244  |
| 250   | 260  | S                | TPGDSSSGWTA                                                              | Srivastava S, et al, Biorxiv,2020           | 0.2473  |
| 180   | 191  | Membrane Protein | KL GASQRVAGDS                                                            | Srivastava S, et al, Biorxiv,2020           | 0.0439  |
| 17    | 25   | ORF7a            | LYHYQECVR                                                                | Srivastava S, et al, Biorxiv,2020           | 0.024   |

**Supplementary Table 3E. Discontinuous B-cell epitopes predicted by DiscoTope 2 with the discotope score threshold of -3.7 (default setting).**

| chain_id | residue_id | residue_name | contact_number | propensity_score | discotope_score | locations on the 3D structure of SARS-CoV-2 (PDB ID: 6VSB) |
|----------|------------|--------------|----------------|------------------|-----------------|------------------------------------------------------------|
| A        | 281        | GLU          | 0              | -3.366           | -2.979          | stem                                                       |
| A        | 282        | ASN          | 7              | -2.664           | -3.162          | stem                                                       |
| A        | 415        | THR          | 0              | -3.819           | -3.38           | head                                                       |
| A        | 420        | ASP          | 4              | -3.618           | -3.662          | head                                                       |
| A        | 449        | TYR          | 4              | -0.567           | -0.962          | head                                                       |
| A        | 450        | ASN          | 11             | -1.78            | -2.841          | head                                                       |
| A        | 454        | ARG          | 14             | -1.224           | -2.694          | head                                                       |
| A        | 491        | PRO          | 7              | -0.72            | -1.442          | head                                                       |
| A        | 492        | LEU          | 15             | -0.95            | -2.565          | head                                                       |
| A        | 493        | GLN          | 9              | -0.572           | -1.541          | head                                                       |
| A        | 494        | SER          | 7              | -0.846           | -1.553          | head                                                       |
| A        | 496        | GLY          | 3              | 0.041            | -0.309          | head                                                       |
| A        | 498        | GLN          | 4              | 0.68             | 0.142           | head                                                       |
| A        | 499        | PRO          | 5              | 0.178            | -0.417          | head                                                       |
| A        | 500        | THR          | 0              | 1.907            | 1.688           | head                                                       |
| A        | 503        | VAL          | 5              | -1.856           | -2.218          | head                                                       |
| A        | 505        | TYR          | 8              | -1.528           | -2.272          | head                                                       |
| A        | 556        | ASN          | 2              | -3.79            | -3.584          | stem                                                       |
| A        | 558        | LYS          | 2              | -1.479           | -1.539          | head                                                       |
| A        | 560        | LEU          | 2              | -1.137           | -1.236          | stem                                                       |
| A        | 561        | PRO          | 0              | -0.961           | -0.851          | head                                                       |
| A        | 562        | PHE          | 0              | -2.061           | -1.824          | head                                                       |
| A        | 703        | ASN          | 4              | -2.02            | -2.248          | stem                                                       |
| A        | 704        | SER          | 3              | -1.469           | -1.645          | stem                                                       |
| A        | 705        | VAL          | 10             | -2.821           | -3.646          | stem                                                       |
| A        | 793        | PRO          | 1              | -2.278           | -2.131          | stem                                                       |
| A        | 794        | ILE          | 1              | -2.5             | -2.327          | stem                                                       |
| A        | 809        | PRO          | 4              | -2.691           | -2.841          | stem                                                       |
| A        | 810        | SER          | 9              | -0.669           | -1.627          | stem                                                       |
| A        | 914        | ASN          | 7              | -1.117           | -1.794          | stem                                                       |
| A        | 917        | TYR          | 9              | -2.702           | -3.426          | stem                                                       |
| A        | 918        | GLU          | 13             | -2.285           | -3.517          | stem                                                       |
| A        | 1071       | GLN          | 9              | -2.775           | -3.491          | stem                                                       |
| A        | 1099       | GLY          | 1              | -3.789           | -3.468          | stem                                                       |
| A        | 1100       | THR          | 0              | -3.877           | -3.431          | stem                                                       |
| A        | 1101       | HIS          | 8              | -2.903           | -3.489          | stem                                                       |
| A        | 1111       | GLU          | 19             | -1.693           | -3.684          | stem                                                       |
| A        | 1118       | ASP          | 4              | -3.016           | -3.129          | stem                                                       |
| A        | 1140       | PRO          | 7              | -0.961           | -1.656          | root                                                       |
| A        | 1141       | LEU          | 5              | -0.257           | -0.802          | root                                                       |
| A        | 1142       | GLN          | 7              | 0.318            | -0.523          | root                                                       |
| A        | 1143       | PRO          | 6              | 1.067            | 0.255           | root                                                       |
| A        | 1144       | GLU          | 6              | 0.716            | -0.056          | root                                                       |
| A        | 1145       | LEU          | 5              | 0.162            | -0.431          | root                                                       |
| A        | 1146       | ASP          | 5              | 0.731            | 0.072           | root                                                       |
| B        | 187        | LYS          | 9              | -2.398           | -3.158          | stem                                                       |
| B        | 209        | PRO          | 1              | -3.243           | -2.985          | head                                                       |
| B        | 281        | GLU          | 0              | -4.065           | -3.597          | stem                                                       |
| B        | 282        | ASN          | 6              | -2.337           | -2.758          | stem                                                       |
| B        | 415        | THR          | 0              | -2.448           | -2.167          | head                                                       |
| B        | 417        | LYS          | 15             | -2.055           | -3.544          | head                                                       |
| B        | 420        | ASP          | 5              | -3.2             | -3.407          | head                                                       |
| B        | 449        | TYR          | 3              | -1.991           | -2.107          | head                                                       |
| B        | 460        | ASN          | 15             | -0.073           | -1.79           | head                                                       |
| B        | 462        | LYS          | 2              | -3.079           | -2.955          | head                                                       |
| B        | 469        | SER          | 1              | -2.505           | -2.332          | head                                                       |
| B        | 471        | GLU          | 1              | -2.616           | -2.43           | head                                                       |
| B        | 472        | ILE          | 3              | -3.202           | -3.179          | head                                                       |
| B        | 473        | TYR          | 11             | -2.078           | -3.104          | head                                                       |
| B        | 487        | ASN          | 0              | -1.605           | -1.42           | head                                                       |
| B        | 488        | CYS          | 3              | -2.718           | -2.75           | head                                                       |
| B        | 489        | TYR          | 6              | -3.009           | -3.353          | head                                                       |
| B        | 493        | GLN          | 12             | -2.368           | -3.476          | head                                                       |
| B        | 494        | SER          | 8              | -2.189           | -2.858          | head                                                       |
| B        | 496        | GLY          | 1              | -0.693           | -0.728          | head                                                       |
| B        | 497        | PHE          | 18             | -1.153           | -3.091          | head                                                       |
| B        | 498        | GLN          | 7              | 1.188            | 0.246           | head                                                       |

|   |      |     |    |        |        |      |
|---|------|-----|----|--------|--------|------|
| B | 499  | PRO | 5  | 0.294  | -0.315 | head |
| B | 500  | THR | 1  | 2.231  | 1.86   | head |
| B | 503  | VAL | 6  | -1.621 | -2.124 | head |
| B | 504  | GLY | 0  | -2.702 | -2.392 | head |
| B | 505  | TYR | 9  | -1.67  | -2.513 | head |
| B | 556  | ASN | 2  | -3.692 | -3.497 | stem |
| B | 558  | LYS | 2  | -2.13  | -2.115 | stem |
| B | 560  | LEU | 1  | -3.858 | -3.529 | stem |
| B | 561  | PRO | 0  | -3.986 | -3.528 | stem |
| B | 703  | ASN | 4  | -2.12  | -2.336 | stem |
| B | 704  | SER | 3  | -1.967 | -2.086 | stem |
| B | 705  | VAL | 10 | -2.857 | -3.678 | stem |
| B | 716  | THR | 10 | -2.78  | -3.61  | stem |
| B | 793  | PRO | 0  | -2.542 | -2.25  | stem |
| B | 794  | ILE | 3  | -2.633 | -2.675 | stem |
| B | 809  | PRO | 4  | -3.089 | -3.193 | stem |
| B | 810  | SER | 9  | -1.014 | -1.932 | stem |
| B | 914  | ASN | 6  | -1.369 | -1.901 | stem |
| B | 917  | TYR | 9  | -2.268 | -3.042 | stem |
| B | 918  | GLU | 11 | -2.251 | -3.257 | stem |
| B | 1071 | GLN | 7  | -3.08  | -3.53  | stem |
| B | 1111 | GLU | 19 | -1.343 | -3.373 | stem |
| B | 1114 | ILE | 8  | -2.852 | -3.444 | stem |
| B | 1118 | ASP | 5  | -2.997 | -3.228 | stem |
| B | 1140 | PRO | 8  | -0.677 | -1.519 | root |
| B | 1141 | LEU | 5  | -0.017 | -0.59  | root |
| B | 1142 | GLN | 7  | 0.372  | -0.476 | root |
| B | 1143 | PRO | 6  | 0.629  | -0.134 | root |
| B | 1144 | GLU | 4  | 0.704  | 0.163  | root |
| B | 1145 | LEU | 5  | 0.171  | -0.424 | root |
| B | 1146 | ASP | 4  | 0.724  | 0.181  | root |
| C | 281  | GLU | 0  | -3.898 | -3.45  | stem |
| C | 282  | ASN | 3  | -2.566 | -2.616 | stem |
| C | 415  | THR | 0  | -3.378 | -2.989 | head |
| C | 449  | TYR | 3  | -1.844 | -1.977 | head |
| C | 460  | ASN | 11 | -0.126 | -1.376 | head |
| C | 462  | LYS | 1  | -2.996 | -2.767 | head |
| C | 469  | SER | 5  | -2.411 | -2.708 | head |
| C | 470  | THR | 12 | -2.535 | -3.624 | head |
| C | 471  | GLU | 2  | -1.882 | -1.896 | head |
| C | 487  | ASN | 0  | -1.487 | -1.316 | head |
| C | 488  | CYS | 0  | -2.512 | -2.223 | head |
| C | 489  | TYR | 7  | -2.629 | -3.132 | head |
| C | 493  | GLN | 9  | -2.288 | -3.06  | head |
| C | 494  | SER | 7  | -2.316 | -2.854 | head |
| C | 496  | GLY | 1  | -1.754 | -1.668 | head |
| C | 498  | GLN | 3  | -0.804 | -1.057 | head |
| C | 503  | VAL | 10 | -2.855 | -3.677 | head |
| C | 504  | GLY | 0  | -2.423 | -2.145 | head |
| C | 505  | TYR | 9  | -2.339 | -3.105 | head |
| C | 556  | ASN | 0  | -3.139 | -2.778 | stem |
| C | 558  | LYS | 1  | -1.819 | -1.725 | stem |
| C | 560  | LEU | 1  | -2.713 | -2.516 | stem |
| C | 561  | PRO | 0  | -3.804 | -3.367 | stem |
| C | 703  | ASN | 3  | -2.135 | -2.235 | stem |
| C | 704  | SER | 3  | -1.544 | -1.711 | stem |
| C | 793  | PRO | 0  | -2.671 | -2.364 | stem |
| C | 794  | ILE | 4  | -2.452 | -2.63  | stem |
| C | 809  | PRO | 4  | -3.118 | -3.22  | stem |
| C | 810  | SER | 9  | -1.295 | -2.181 | stem |
| C | 914  | ASN | 9  | -0.693 | -1.648 | stem |
| C | 917  | TYR | 9  | -2.612 | -3.347 | stem |
| C | 918  | GLU | 12 | -1.782 | -2.957 | stem |
| C | 1071 | GLN | 7  | -2.99  | -3.451 | stem |
| C | 1074 | ASN | 7  | -2.785 | -3.27  | stem |
| C | 1100 | THR | 0  | -3.348 | -2.963 | stem |
| C | 1111 | GLU | 18 | -1.566 | -3.456 | stem |
| C | 1114 | ILE | 8  | -2.926 | -3.51  | stem |
| C | 1118 | ASP | 4  | -3.023 | -3.136 | stem |
| C | 1140 | PRO | 8  | -1.41  | -2.168 | root |

|   |      |     |   |        |        |      |
|---|------|-----|---|--------|--------|------|
| C | 1141 | LEU | 3 | -0.304 | -0.614 | root |
| C | 1142 | GLN | 6 | 0.278  | -0.444 | root |
| C | 1143 | PRO | 6 | 0.79   | 0.009  | root |
| C | 1144 | GLU | 4 | 0.433  | -0.077 | root |
| C | 1145 | LEU | 4 | 0.405  | -0.101 | root |
| C | 1146 | ASP | 4 | 0.234  | -0.253 | root |

---

**Supplementary Table 4. Discontinuous epitopes in the spike head of S protein.**

| Chain | Residue | Residue | Contact number | Propensity | Discotope | Chain | Residue | Residue | Contact number | Propensity | Discotope |
|-------|---------|---------|----------------|------------|-----------|-------|---------|---------|----------------|------------|-----------|
| A     | 415     | THR     | 0              | -3.819     | -3.38     | B     | 488     | CYS     | 3              | -2.718     | -2.75     |
| A     | 420     | ASP     | 4              | -3.618     | -3.662    | B     | 489     | TYR     | 6              | -3.009     | -3.353    |
| A     | 449     | TYR     | 4              | -0.567     | -0.962    | B     | 493     | GLN     | 12             | -2.368     | -3.476    |
| A     | 450     | ASN     | 11             | -1.78      | -2.841    | B     | 494     | SER     | 8              | -2.189     | -2.858    |
| A     | 454     | ARG     | 14             | -1.224     | -2.694    | B     | 496     | GLY     | 1              | -0.693     | -0.728    |
| A     | 491     | PRO     | 7              | -0.72      | -1.442    | B     | 497     | PHE     | 18             | -1.153     | -3.091    |
| A     | 492     | LEU     | 15             | -0.95      | -2.565    | B     | 498     | GLN     | 7              | 1.188      | 0.246     |
| A     | 493     | GLN     | 9              | -0.572     | -1.541    | B     | 499     | PRO     | 5              | 0.294      | -0.315    |
| A     | 494     | SER     | 7              | -0.846     | -1.553    | B     | 500     | THR     | 1              | 2.231      | 1.86      |
| A     | 496     | GLY     | 3              | 0.041      | -0.309    | B     | 503     | VAL     | 6              | -1.621     | -2.124    |
| A     | 498     | GLN     | 4              | 0.68       | 0.142     | B     | 504     | GLY     | 0              | -2.702     | -2.392    |
| A     | 499     | PRO     | 5              | 0.178      | -0.417    | B     | 505     | TYR     | 9              | -1.67      | -2.513    |
| A     | 500     | THR     | 0              | 1.907      | 1.688     | C     | 415     | THR     | 0              | -3.378     | -2.989    |
| A     | 503     | VAL     | 5              | -1.856     | -2.218    | C     | 449     | TYR     | 3              | -1.844     | -1.977    |
| A     | 505     | TYR     | 8              | -1.528     | -2.272    | C     | 460     | ASN     | 11             | -0.126     | -1.376    |
| A     | 558     | LYS     | 2              | -1.479     | -1.539    | C     | 462     | LYS     | 1              | -2.996     | -2.767    |
| A     | 561     | PRO     | 0              | -0.961     | -0.851    | C     | 469     | SER     | 5              | -2.411     | -2.708    |
| A     | 562     | PHE     | 0              | -2.061     | -1.824    | C     | 470     | THR     | 12             | -2.535     | -3.624    |
| B     | 209     | PRO     | 1              | -3.243     | -2.985    | C     | 471     | GLU     | 2              | -1.882     | -1.896    |
| B     | 415     | THR     | 0              | -2.448     | -2.167    | C     | 487     | ASN     | 0              | -1.487     | -1.316    |
| B     | 417     | LYS     | 15             | -2.055     | -3.544    | C     | 488     | CYS     | 0              | -2.512     | -2.223    |
| B     | 420     | ASP     | 5              | -3.2       | -3.407    | C     | 489     | TYR     | 7              | -2.629     | -3.132    |
| B     | 449     | TYR     | 3              | -1.991     | -2.107    | C     | 493     | GLN     | 9              | -2.288     | -3.06     |
| B     | 460     | ASN     | 15             | -0.073     | -1.79     | C     | 494     | SER     | 7              | -2.316     | -2.854    |
| B     | 462     | LYS     | 2              | -3.079     | -2.955    | C     | 496     | GLY     | 1              | -1.754     | -1.668    |
| B     | 469     | SER     | 1              | -2.505     | -2.332    | C     | 498     | GLN     | 3              | -0.804     | -1.057    |
| B     | 471     | GLU     | 1              | -2.616     | -2.43     | C     | 503     | VAL     | 10             | -2.855     | -3.677    |
| B     | 472     | ILE     | 3              | -3.202     | -3.179    | C     | 504     | GLY     | 0              | -2.423     | -2.145    |
| B     | 487     | ASN     | 0              | -1.605     | -1.42     |       |         |         |                |            |           |

Supplementary Table 5A. Allergenicity, toxicity, hydro and physiochemical properties of the ten linear B-cell epitopes without allergenicity and toxicity in RBD of S protein.

| Peptide Sequence           | Allergenicity | Toxicity | Hydrophobicity | Hydropathicity | Hydrophilicity | Charge | pI   | Mol wt  |
|----------------------------|---------------|----------|----------------|----------------|----------------|--------|------|---------|
| APGQTGKIADYNYKL            | NA            | NT       | -0.16          | -0.81          | -0.01          | 1      | 8.76 | 1639.06 |
| APGQTGKIADYNYKLPDDFT       | NA            | NT       | -0.17          | -0.93          | 0.15           | -1     | 4.43 | 2214.7  |
| GDEVQRQIAPGQTGKIADYNYKLP   | NA            | NT       | -0.21          | -0.89          | 0.25           | 0      | 6.46 | 2534.17 |
| KCVNFNFNGLTG               | NA            | NT       | -0.05          | 0.02           | -0.51          | 1      | 8.57 | 1313.67 |
| KIADYNYKLPDDFT             | NA            | NT       | -0.22          | -0.99          | 0.26           | -1     | 4.43 | 1703.07 |
| TNLCPPFG                   | NA            | NT       | 0.06           | 0.41           | -0.79          | 0      | 5.85 | 750.96  |
| VRQIAPGQTGKIAD             | NA            | NT       | -0.17          | -0.37          | 0.21           | 1      | 9.1  | 1453.87 |
| YGVSP TKLND                | NA            | NT       | -0.17          | -0.77          | 0.05           | 0      | 6.18 | 1093.34 |
| YNSASFSTFKCYGVSP TKLNDLCFT | NA            | NT       | -0.08          | -0.05          | -0.41          | 1      | 8.33 | 2794.49 |
| YQPYRVV VLSFELLH           | NA            | NT       | 0              | 0.47           | -0.73          | 0.5    | 7.1  | 1863.42 |

NA non-allergic, NT non-toxic.

Supplementary Table 5B. Non-digesting enzymes of the ten linear B-cell epitopes without allergenicity and toxicity in RBD of S protein.

| Peptide                    | Non-digesting enzymes                                                                       |
|----------------------------|---------------------------------------------------------------------------------------------|
| APGQTGKIADYNYKL            | Cyanogen_Bromide,Clostripain,Staph_Protease,Trypsin_R,IodosoBenzoate                        |
| APGQTGKIADYNYKLPDDFT       | Cyanogen_Bromide,Clostripain,Staph_Protease,Trypsin_R,IodosoBenzoate                        |
| GDEVQRQIAPGQTGKIADYNYKLP   | Cyanogen_Bromide,IodosoBenzoate                                                             |
| KCVNFNFNGLTG               | Proline_Endopept,Cyanogen_Bromide,AspN,Clostripain,Staph_Protease,Trypsin_R,IodosoBenzoate  |
| KIADYNYKLPDDFT             | Cyanogen_Bromide,Clostripain,Staph_Protease,Trypsin_R,IodosoBenzoate                        |
| TNLCPPFG                   | Trypsin,Cyanogen_Bromide,Trypsin_K,AspN,Clostripain,Staph_Protease,Trypsin_R,IodosoBenzoate |
| VRQIAPGQTGKIAD             | Chymotrypsin,Cyanogen_Bromide,Staph_Protease,Chymotrypsin(modified),IodosoBenzoate          |
| YGVSP TKLND                | Cyanogen_Bromide,Clostripain,Staph_Protease,Trypsin_R,IodosoBenzoate                        |
| YNSASFSTFKCYGVSP TKLNDLCFT | Cyanogen_Bromide,Clostripain,Staph_Protease,Trypsin_R,IodosoBenzoate                        |
| YQPYRVV VLSFELLH           | Cyanogen_Bromide,Trypsin_K,AspN,IodosoBenzoate                                              |



**Supplementary Table 6A. MHC class-I allele binding epitopes from S protein.**

| Peptide    | Antigenicity | Nr_alleles | Alleles                                              |
|------------|--------------|------------|------------------------------------------------------|
| IPFAMQMAYR | 1.5145       | 3          | A*68:01, B*35:01, A*33:01                            |
| VVFLHVITYV | 1.5122       | 3          | A*02:03, A*02:06, A*68:02                            |
| FPNITNLCPF | 1.3964       | 4          | B*53:01, B*35:01, B*51:01, B*07:02                   |
| KWPWYIWLGF | 1.3904       | 3          | A*24:02, A*23:01, A*32:01                            |
| LPIGINITRF | 1.3027       | 3          | B*53:01, B*35:01, B*51:01                            |
| IAIVMVTIM  | 1.1339       | 4          | B*58:01, B*51:01, B*53:01, B*35:01                   |
| ESNKKFLPF  | 1.0278       | 4          | B*15:01, B*08:01, A*26:01, A*32:01                   |
| LPFFSNVTW  | 1.0808       | 3          | B*53:01, B*51:01, B*57:01                            |
| FAMQMA YRF | 1.0278       | 6          | B*35:01, B*53:01, A*23:01, B*58:01, A*24:02, B*08:01 |

**Supplementary Table 6B. MHC class-I allele binding epitopes from M protein.**

| Peptide    | Antigenicity | Nr_alleles | Alleles                                         |
|------------|--------------|------------|-------------------------------------------------|
| EQWNLVIGF  | 1.3869       | 6          | B*44:03,A*32:01,B*15:01,B*44:02,B*40:01,A*26:01 |
| LVIGAVILR  | 1.1027       | 5          | A*68:01,A*33:01,A*31:01,A*11:01,A*03:01         |
| RTRSMWSF   | 1.4716       | 4          | B*57:01,A*30:01,A*32:01,B*58:01                 |
| LAAYRINW   | 1.4322       | 4          | B*58:01,B*57:01,B*53:01,A*32:01                 |
| VIGFLFTW   | 1.1465       | 3          | A*32:01,B*58:01,B*57:01                         |
| GTITVEELK  | 1.0976       | 3          | A*11:01,A*68:01,A*03:01                         |
| LEQWNLVIGF | 1.0564       | 3          | B*44:03,B*44:02,B*40:01                         |
| VLAAYRINW  | 1.1808       | 3          | B*58:01,B*57:01,A*32:01                         |
| DSGFAAYSRY | 1.0869       | 3          | A*26:01,A*01:01,A*30:02                         |

**Supplementary Table 6C. MHC class-I allele binding epitopes from N protein.**

| Peptide    | Antigenicity | Nr_alleles | Alleles                                                         |
|------------|--------------|------------|-----------------------------------------------------------------|
| KMKDLSRW   | 1.7462       | 8          | A*32:01,B*57:01,B*58:01,B*15:01,A*30:02,A*23:01,B*53:01,A*24:02 |
| KLDDKPNF   | 2.6591       | 6          | A*32:01,A*02:06,A*02:01,A*01:01,A*30:02,B*15:01                 |
| KMKDLSRWY  | 1.5032       | 6          | A*30:02,B*15:01,A*03:01,A*01:01,A*32:01,B*57:01                 |
| DLSRWYFY   | 1.7645       | 5          | A*26:01,A*01:01,A*30:02,A*33:01,B*35:01                         |
| SSRGTSRPAR | 1.2455       | 4          | A*31:01,A*30:01,A*33:01,A*68:01                                 |
| GKMKDLSRW  | 1.3748       | 3          | B*57:01,B*58:01,A*32:01                                         |
| SSRSRNSSR  | 1.1218       | 3          | A*31:01,A*30:01,A*33:01                                         |
| NFKDQVILL  | 1.1677       | 3          | A*23:01,A*24:02,B*08:01                                         |
| DPNFKDQVI  | 1.7367       | 3          | B*51:01,B*53:01,B*08:01                                         |

**Supplementary Table 7A. MHC class-II allele binding epitopes from S protein.**

| Peptide         | Antigenicity | Nr_alleles | Alleles                                                                                                                                                                                                                       |
|-----------------|--------------|------------|-------------------------------------------------------------------------------------------------------------------------------------------------------------------------------------------------------------------------------|
| VGYPYRVVLSFEL   | 1.3858       | 6          | DPA1*01:03/DPB1*04:01, DRB1*04:05,<br>DPA1*02:01/DPB1*14:01, DPA1*01:03/DPB1*02:01,<br>DRB1*07:01, DPA1*02:01/DPB1*05:01                                                                                                      |
| FAMQMAYRFNGIGVT | 1.3688       | 5          | DRB3*02:02, DRB3*01:01, DRB1*08:02,<br>DRB1*11:01, DRB5*01:01                                                                                                                                                                 |
| IPFAMQMAYRFNGIG | 1.2828       | 8          | DRB4*01:01, DRB1*01:01, DRB5*01:01,<br>DRB3*01:01, DRB3*02:02, DRB1*12:01,<br>DRB1*15:01, DPA1*01:03/DPB1*04:01                                                                                                               |
| NFTISVTTEILPVSM | 1.2136       | 8          | DRB1*07:01, DPA1*03:01/DPB1*04:02,<br>DQA1*03:01/DQB1*03:02, DPA1*02:01/DPB1*01:01,<br>DPA1*02:01/DPB1*14:01, DQA1*05:01/DQB1*02:01,<br>DRB1*04:01, DRB3*02:02                                                                |
| LVLPLVSSQCVNLT  | 1.2086       | 5          | DRB4*01:01, DRB1*08:02, DRB1*04:01,<br>DRB1*15:01, DRB1*04:05                                                                                                                                                                 |
| VVFLHVTYVPAQEKN | 1.172        | 10         | DRB1*04:05, DPA1*01:03/DPB1*02:01, DRB1*08:02,<br>DQA1*04:01/DQB1*04:02, DRB1*04:01,<br>DRB5*01:01, DPA1*01:03/DPB1*04:01,<br>DQA1*03:01/DQB1*03:02                                                                           |
| TNFTISVTTEILPVS | 1.1691       | 9          | DPA1*02:01/DPB1*14:01, DQA1*05:01/DQB1*02:01<br>DRB1*07:01, DRB1*09:01, DRB3*02:02,<br>DQA1*03:01/DQB1*03:02,<br>DQA1*05:01/DQB1*02:01, DRB1*04:01,<br>DPA1*02:01/DPB1*01:01, DPA1*02:01/DPB1*14:01,<br>DPA1*03:01/DPB1*04:02 |
| QYIKWPWYIWLGFIA | 1.1541       | 6          | DPA1*01:03/DPB1*04:01, DPA1*02:01/DPB1*01:01,<br>DPA1*01:03/DPB1*02:01, DQA1*01:01/DQB1*05:01,<br>DPA1*02:01/DPB1*05:01, DPA1*03:01/DPB1*04:02                                                                                |
| PTNFTISVTTEILPV | 1.1349       | 8          | DRB1*07:01, HLA-DRB1*09:01, DRB3*02:02,<br>DQA1*03:01/DQB1*03:02,<br>DQA1*05:01/DQB1*02:01, DPA1*02:01/DPB1*01:01,<br>DRB1*04:01, DPA1*03:01/DPB1*04:02                                                                       |
| GVVFLHVTYVPAQEK | 1.1043       | 11         | DRB1*04:05, DPA1*01:03/DPB1*02:01, DRB1*08:02,<br>DRB1*04:01, DPA1*01:03/DPB1*04:01, DRB1*01:01,<br>DQA1*05:01/DQB1*02:01<br>DQA1*04:01/DQB1*04:02,<br>DQA1*03:01/DQB1*03:02, DRB1*07:01,<br>DPA1*02:01/DPB1*14:01            |
| GYQPYRVVLSFELL  | 1.074        | 11         | DPA1*02:01/DPB1*01:01, DPA1*01:03/DPB1*02:01,<br>DPA1*01:03/DPB1*04:01, DPA1*02:01/DPB1*05:01,<br>DPA1*02:01/DPB1*14:01, DRB1*04:05, DRB4*01:01,<br>DPA1*03:01/DPB1*04:02, DRB1*07:01, DRB1*15:01,<br>DQA1*05:01/DQB1*02:01   |
| VFLHVTYVPAQEKNF | 1.0339       | 5          | DRB5*01:01, DQA1*04:01/DQB1*04:02,<br>DPA1*01:03/DPB1*02:01, DPA1*02:01/DPB1*14:01,<br>DRB1*07:01                                                                                                                             |
| ALQIPFAMQMAYRFN | 1.0112       | 10         | DRB4*01:01, DRB5*01:01, DPA1*02:01/DPB1*14:01,<br>DRB1*01:01, DRB1*12:01, DRB3*01:01,<br>DRB3*02:02, DPA1*01:03/DPB1*04:01, DRB1*03:01,<br>DRB1*15:01                                                                         |

**Supplementary Table 7B. MHC class-II allele binding epitopes from M protein.**

| Peptide         | Antigenicity | Nr_alleles | Alleles                                                                                                                                                                         |
|-----------------|--------------|------------|---------------------------------------------------------------------------------------------------------------------------------------------------------------------------------|
| LACFVLAAYRINWI  | 1.2905       | 12         | DRB1*07:01,DRB3*01:01,DRB5*01:01,DRB1*01:01,DPA1*01:03/DPB1*02:01,DPA1*02:01/DPB1*05:01,DPA1*01:03/DPB1*04:01,DRB1*12:01,DRB1*11:01,DRB1*04:01,DRB1*09:01,DQA1*01:01/DQB1*05:01 |
| TLACFVLAAYRINW  | 1.3132       | 11         | DRB1*07:01,DRB3*01:01,DRB5*01:01,DRB1*01:01,DPA1*01:03/DPB1*02:01,DPA1*02:01/DPB1*05:01,DPA1*01:03/DPB1*04:01,DRB1*12:01,DRB1*04:01,DRB1*11:01,DRB1*09:01                       |
| VTLACFVLAAYRIN  | 1.045        | 11         | DRB1*07:01,DRB3*01:01,DRB5*01:01,DRB1*01:01,DPA1*01:03/DPB1*02:01,DPA1*02:01/DPB1*05:01,DPA1*01:03/DPB1*04:01,DRB1*09:01,DQA1*01:01/DQB1*05:01,DRB1*04:01,DRB1*04:05            |
| ACFVLAAYRINWIT  | 1.1115       | 10         | DRB1*07:01,DRB3*01:01,DRB5*01:01,DRB1*01:01,DPA1*01:03/DPB1*02:01,DPA1*01:03/DPB1*04:01,DRB1*11:01,DRB1*04:01,DRB1*12:01,DRB1*09:01                                             |
| CFVLAAYRINWITG  | 1.0062       | 8          | DRB1*07:01,DRB1*01:01,DRB5*01:01,DPA1*01:03/DPB1*02:01,DRB3*01:01,DRB1*04:01,DRB1*11:01,DPA1*01:03/DPB1*04:01                                                                   |
| IGFLFLTWICLLQFA | 1.1111       | 8          | DPA1*03:01/DPB1*04:02,DPA1*01:03/DPB1*02:01,DPA1*02:01/DPB1*01:01,DQA1*01:01/DQB1*05:01,DQA1*05:01/DQB1*02:01,DPA1*01:03/DPB1*04:01,DPA1*02:01/DPB1*05:01,DRB1*07:01            |
| YRINWITGGIAIAMA | 1.1274       | 7          | DQA1*01:02/DQB1*06:02,DQA1*05:01/DQB1*03:01,DRB3*02:02,DRB1*01:01,DRB1*13:02,DRB1*09:01,DPA1*02:01/DPB1*14:01                                                                   |
| FVLAAYRINWITGG  | 1.023        | 7          | DRB1*07:01,DRB3*02:02,DRB3*01:01,DRB5*01:01,DRB1*11:01,DQA1*01:01/DQB1*05:01,DRB1*01:01                                                                                         |
| NLVIGFLFLTWICLL | 1.2609       | 6          | DPA1*01:03/DPB1*02:01,DPA1*03:01/DPB1*04:02,DPA1*02:01/DPB1*01:01,DPA1*02:01/DPB1*05:01,DQA1*01:01/DQB1*05:01,DRB1*15:01                                                        |
| LVIGFLFLTWICLLQ | 1.0776       | 6          | DPA1*03:01/DPB1*04:02,DPA1*01:03/DPB1*02:01,DPA1*02:01/DPB1*01:01,DQA1*01:01/DQB1*05:01,DPA1*02:01/DPB1*05:01,DRB1*15:01                                                        |
| WNLVIGFLFLTWICL | 1.4689       | 6          | DPA1*01:03/DPB1*02:01,DPA1*03:01/DPB1*04:02,DPA1*02:01/DPB1*05:01,DQA1*01:01/DQB1*05:01,DRB1*15:01,DRB1*07:01                                                                   |
| LTWICLLQFAYANRN | 1.2337       | 6          | DRB1*12:01,DRB4*01:01,DPA1*01:03/DPB1*02:01,DPA1*01:03/DPB1*04:01,DRB5*01:01,DPA1*02:01/DPB1*01:01                                                                              |
| LEQWNLVIGFLFTW  | 1.0231       | 5          | DPA1*01:03/DPB1*02:01,DPA1*02:01/DPB1*05:01,DRB1*15:01,DPA1*01:03/DPB1*04:01,DQA1*01:01/DQB1*05:01                                                                              |

**Supplementary Table 8A. Allergenicity, toxicity, hydro and physiochemical properties of T-cell epitopes from S protein.**

| Peptide                              | Allergenicity | Toxicity | Hydrophobicity | Hydrophaticity | Hydrophilicity | Charge | pI    | Mol wt  |
|--------------------------------------|---------------|----------|----------------|----------------|----------------|--------|-------|---------|
| <b>MHC class I binding peptides</b>  |               |          |                |                |                |        |       |         |
| IPFAMQMAYR                           | A             | NT       | -0.01          | 0.38           | -0.7           | 1      | 9.1   | 1227.6  |
| VVFLHVTYV                            | A             | NT       | 0.3            | 2.02           | -1.5           | 0.5    | 7.09  | 1076.4  |
| FPNITNLCPF                           | A             | NT       | 0.09           | 0.55           | -0.96          | 0      | 5.85  | 1165.5  |
| KWPWYIWLGF                           | A             | NT       | 0.2            | 0.12           | -1.56          | 1      | 8.94  | 1385.8  |
| LPIGINTRF                            | NA            | NT       | 0.08           | 0.94           | -0.69          | 1      | 10.11 | 1143.6  |
| IAIVMVTIM                            | NA            | NT       | 0.43           | 2.98           | -1.32          | 0      | 5.88  | 990.47  |
| ESNKKFLPF                            | A             | NT       | -0.23          | -0.87          | 0.3            | 1      | 8.94  | 1109.4  |
| LPFFSNVTW                            | A             | NT       | 0.17           | 0.68           | -1.29          | 0      | 5.88  | 1110.4  |
| FAMQMAYRF                            | A             | NT       | -0.02          | 0.41           | -0.86          | 1      | 9.1   | 1164.5  |
| <b>MHC class II binding peptides</b> |               |          |                |                |                |        |       |         |
| VGYPYRVVLSFEL                        | NA            | NT       | 0.04           | 0.69           | -0.68          | 0      | 6.35  | 1769.3  |
| FAMQMAYRFNGIGVT                      | NA            | NT       | 0.04           | 0.49           | -0.75          | 1      | 9.1   | 1706.23 |
| IPFAMQMAYRFNGIG                      | A             | NT       | 0.06           | 0.45           | -0.74          | 1      | 9.1   | 1716.27 |
| NFTISVTTEILPVSM                      | NA            | NT       | 0.1            | 0.91           | -0.64          | -1     | 4     | 1652.16 |
| LVLLPLVSSQCVNLT                      | NA            | NT       | 0.15           | 1.55           | -0.93          | 0      | 5.85  | 1599.2  |
| VVFLHVTYVPAQEKN                      | NA            | NT       | -0.01          | 0.27           | -0.51          | 0.5    | 7.1   | 1744.25 |
| TNFTISVTTEILPVS                      | NA            | NT       | 0.07           | 0.73           | -0.58          | -1     | 4     | 1622.07 |
| QYIKWPWYIWLGFIA                      | A             | NT       | 0.2            | 0.48           | -1.45          | 1      | 8.83  | 1984.61 |
| PTNFTISVTTEILPV                      | NA            | NT       | 0.09           | 0.68           | -0.6           | -1     | 4     | 1632.11 |
| GVVFLHVTYVPAQEK                      | A             | NT       | 0.04           | 0.47           | -0.52          | 0.5    | 7.1   | 1687.2  |
| GYQPYRVVLSFELL                       | NA            | NT       | 0.04           | 0.66           | -0.7           | 0      | 6.35  | 1783.33 |
| VFLHVTYVPAQEKNF                      | A             | NT       | 0              | 0.17           | -0.57          | 0.5    | 7.1   | 1792.29 |
| ALQIPFAMQMAYRFN                      | NA            | NT       | -0.01          | 0.35           | -0.76          | 1      | 9.1   | 1801.37 |

NA non-allergic, A allergic, NT non-toxic.

Supplementary Table 8B. Allergenicity, toxicity, hydro and physiochemical properties of T-cell epitopes in M protein.

| Peptide                                                                            | Allergenicity | Toxicity | Hydrophobicity | Hydropathicity | Hydrophilicity | Charge | pI    | Mol wt  |
|------------------------------------------------------------------------------------|---------------|----------|----------------|----------------|----------------|--------|-------|---------|
| MHC class I binding peptides (NA non-allergic, A allergic, NT non-toxic, T toxic)  |               |          |                |                |                |        |       |         |
| EQWNLVIGF                                                                          | NA            | NT       | 0.11           | 0.39           | -0.84          | -1     | 4     | 1105.4  |
| LVIGAVILR                                                                          | NA            | NT       | 0.25           | 2.43           | -0.86          | 1      | 10.11 | 953.38  |
| RTRSMWSF                                                                           | A             | NT       | -0.37          | -0.94          | -0.13          | 2      | 12.01 | 1070.33 |
| LAAVYRINW                                                                          | A             | NT       | 0.03           | 0.66           | -0.96          | 1      | 9.1   | 1105.43 |
| VIGFLFTW                                                                           | A             | NT       | 0.43           | 2.21           | -1.74          | 0      | 5.88  | 1095.49 |
| GTITVEELK                                                                          | A             | NT       | -0.08          | -0.02          | 0.34           | -1     | 4.54  | 989.27  |
| LEQWNLVIGF                                                                         | A             | NT       | 0.15           | 0.73           | -0.94          | -1     | 4     | 1218.58 |
| VLAAVYRINW                                                                         | A             | NT       | 0.08           | 1.01           | -1.01          | 1      | 9.1   | 1204.58 |
| DSGFAAYSRY                                                                         | NA            | NT       | -0.17          | -0.62          | -0.15          | 0      | 6.18  | 1136.3  |
| MHC class II binding peptides (NA non-allergic, A allergic, NT non-toxic, T toxic) |               |          |                |                |                |        |       |         |
| LACFVLAAVYRINWI                                                                    | NA            | NT       | 0.2            | 1.7            | -1.18          | 1      | 8.57  | 1752.37 |
| TLACFVLAAVYRINW                                                                    | A             | NT       | 0.14           | 1.35           | -1.09          | 1      | 8.57  | 1740.31 |
| VTLACFVLAAVYRIN                                                                    | NA            | NT       | 0.15           | 1.69           | -0.96          | 1      | 8.57  | 1653.23 |
| ACFVLAAVYRINWIT                                                                    | NA            | NT       | 0.15           | 1.4            | -1.09          | 1      | 8.57  | 1740.31 |
| CFVLAAVYRINWITG                                                                    | A             | NT       | 0.15           | 1.25           | -1.05          | 1      | 8.57  | 1726.29 |
| IGFLFTWICLLQFA                                                                     | NA            | NT       | 0.36           | 2.09           | -1.56          | 0      | 5.85  | 1785.46 |
| YRINWITGGIAIAMA                                                                    | NA            | NT       | 0.14           | 0.91           | -0.86          | 1      | 9.1   | 1650.2  |
| FVLAAVYRINWITGG                                                                    | NA            | NT       | 0.15           | 1.06           | -0.99          | 1      | 9.1   | 1680.21 |
| NLVIGFLFTWICLL                                                                     | NA            | NT       | 0.37           | 2.32           | -1.58          | 0      | 5.85  | 1765.48 |
| LVIGFLFTWICLLQ                                                                     | NA            | T        | 0.37           | 2.32           | -1.58          | 0      | 5.85  | 1779.51 |
| WNLVIGFLFTWICL                                                                     | NA            | NT       | 0.36           | 2.01           | -1.69          | 0      | 5.85  | 1838.53 |
| LTWICLLQFAYANRN                                                                    | NA            | T        | 0              | 0.46           | -0.95          | 1      | 8.57  | 1826.37 |
| LEQWNLVIGFLFTW                                                                     | NA            | NT       | 0.23           | 1.07           | -1.29          | -1     | 4     | 1879.48 |

Supplementary Table 8C. Allergenicity, toxicity, hydro and physiochemical properties of T-cell epitopes in N protein.

| Peptide                      | Allergenicity | Toxicity | Hydrophobicity | Hydropathicity | Hydrophilicity | Charge | pI    | Mol wt  |
|------------------------------|---------------|----------|----------------|----------------|----------------|--------|-------|---------|
| MHC class I binding peptides |               |          |                |                |                |        |       |         |
| KMKDLSPRW                    | A             | NT       | -0.43          | -1.49          | 0.64           | 2      | 10.01 | 1160.52 |
| KLDDKDPNF                    | A             | NT       | -0.44          | -1.87          | 1.21           | -1     | 4.43  | 1091.3  |
| KMKDLSPRWY                   | A             | NT       | -0.38          | -1.47          | 0.35           | 2      | 9.72  | 1323.71 |
| DLSPRWYFY                    | A             | NT       | -0.14          | -0.81          | -0.67          | 0      | 6.18  | 1246.5  |
| SSRGTSPAR                    | A             | NT       | -0.46          | -1.37          | 0.67           | 2      | 12.01 | 918.08  |
| GKMKDLSPRW                   | NA            | NT       | -0.37          | -1.38          | 0.58           | 2      | 10.01 | 1217.59 |
| SSRSRNSSR                    | NA            | NT       | -0.8           | -2.33          | 1.19           | 3      | 12.31 | 1036.17 |
| NFKDQVILL                    | A             | NT       | -0.02          | 0.52           | -0.33          | 0      | 6.19  | 1089.44 |
| DPNFKDQVI                    | A             | NT       | -0.23          | -0.89          | 0.4            | -1     | 4.21  | 1075.31 |

NA non-allergic, A allergic, NT non-toxic, T toxic.

**Supplementary Table 9A. Non-digesting enzymes of T-cell epitopes from S protein.**

| Peptide                              | Non-digesting enzymes                                                                                                                                      |
|--------------------------------------|------------------------------------------------------------------------------------------------------------------------------------------------------------|
| <b>MHC class I binding peptides</b>  |                                                                                                                                                            |
| IPFAMQMAYR                           | Trypsin, Clostripain, IodosoBenzoate, Staph_Protease, Trypsin_K, Trypsin_R, AspN                                                                           |
| VVFLHVTYV                            | Trypsin, Clostripain, Cyanogen_Bromide, IodosoBenzoate, Proline_Endopept, Staph_Protease, Trypsin_K, Trypsin_R, AspN                                       |
| FPNITNLCPF                           | Trypsin, Clostripain, Cyanogen_Bromide, IodosoBenzoate, Staph_Protease, Trypsin_K, Trypsin_R, AspN                                                         |
| KWPWYIWLGF                           | Clostripain, Cyanogen_Bromide, Staph_Protease, Trypsin_R, AspN                                                                                             |
| LPIGINITRF                           | Chymotrypsin, Cyanogen_Bromide, IodosoBenzoate, Staph_Protease, Trypsin_K, AspN, Chymotrypsin(modified)                                                    |
| IAIVMVTIM                            | Trypsin, Chymotrypsin, Clostripain, Cyanogen_Bromide, IodosoBenzoate, Proline_Endopept, Staph_Protease, Trypsin_K, Trypsin_R, AspN, Chymotrypsin(modified) |
| ESNKKFLPF                            | Clostripain, Cyanogen_Bromide, IodosoBenzoate, Trypsin_R, AspN, Elastase                                                                                   |
| LPFFSNVTW                            | Trypsin, Clostripain, Cyanogen_Bromide, IodosoBenzoate, Staph_Protease, Trypsin_K, Trypsin_R, AspN                                                         |
| FAMQMAYRF                            | IodosoBenzoate, Proline_Endopept, Staph_Protease, Trypsin_K, AspN                                                                                          |
| <b>MHC class II binding peptides</b> |                                                                                                                                                            |
| VGYPYRVVLSFEL                        | Cyanogen_Bromide, IodosoBenzoate, Trypsin_K, AspN                                                                                                          |
| FAMQMAYRFNGIGVT                      | IodosoBenzoate, Proline_Endopept, Staph_Protease, Trypsin_K, AspN                                                                                          |
| IPFAMQMAYRFNGIG                      | IodosoBenzoate, Staph_Protease, Trypsin_K, AspN                                                                                                            |
| NFTISVTTEILPVSM                      | Trypsin, Clostripain, Cyanogen_Bromide, IodosoBenzoate, Trypsin_K, Trypsin_R, AspN                                                                         |
| LVLLPLVSSQCVNLT                      | Trypsin, Chymotrypsin, Clostripain, Cyanogen_Bromide, IodosoBenzoate, Staph_Protease, Trypsin_K, Trypsin_R, AspN                                           |
| VVFLHVTYVPAQEKN                      | Clostripain, Cyanogen_Bromide, IodosoBenzoate, Trypsin_R, AspN                                                                                             |
| TNFTISVTTEILPVS                      | Trypsin, Clostripain, Cyanogen_Bromide, IodosoBenzoate, Trypsin_K, Trypsin_R, AspN                                                                         |
| QYIKWPWYIWLGFIA                      | Clostripain, Cyanogen_Bromide, Staph_Protease, Trypsin_R, AspN                                                                                             |
| PTNFTISVTTEILPV                      | Trypsin, Clostripain, Cyanogen_Bromide, IodosoBenzoate, Trypsin_K, Trypsin_R, AspN                                                                         |
| GVVFLHVTYVPAQEK                      | Trypsin, Clostripain, Cyanogen_Bromide, IodosoBenzoate, Trypsin_K, Trypsin_R, AspN                                                                         |
| GYQPYRVVLSFELL                       | Cyanogen_Bromide, IodosoBenzoate, Trypsin_K, AspN                                                                                                          |
| VFLHVTYVPAQEKNF                      | Clostripain, Cyanogen_Bromide, IodosoBenzoate, Trypsin_R, AspN                                                                                             |
| ALQIPFAMQMAYRFN                      | IodosoBenzoate, Staph_Protease, Trypsin_K, AspN                                                                                                            |



Supplementary Table 9B. Non-digesting enzymes of T-cell epitopes in M protein.

| Peptide                       | Non-digesting enzymes                                                                                                              |
|-------------------------------|------------------------------------------------------------------------------------------------------------------------------------|
| MHC class I binding peptides  |                                                                                                                                    |
| EQWNLVIGF                     | Proline_Endopept, Trypsin, Cyanogen_Bromide, Trypsin_K, AspN, Clostripain, Trypsin_R                                               |
| LVIGAVILR                     | Proline_Endopept, Chymotrypsin, Trypsin, Cyanogen_Bromide, Trypsin_K, AspN, Clostripain, Staph_Protease, Trypsin_R, IodosoBenzoate |
| RTRSMWSF                      | Proline_Endopept, Trypsin_K, AspN, Staph_Protease, Elastase                                                                        |
| LAAVYRINW                     | Proline_Endopept, Cyanogen_Bromide, Trypsin_K, AspN, Staph_Protease, IodosoBenzoate                                                |
| VIGFLFLTW                     | Proline_Endopept, Trypsin, Cyanogen_Bromide, Trypsin_K, AspN, Clostripain, Staph_Protease, Trypsin_R, IodosoBenzoate               |
| GTITVEELK                     | Proline_Endopept, Chymotrypsin, Trypsin, Cyanogen_Bromide, Trypsin_K, AspN, Clostripain, Trypsin_R, IodosoBenzoate                 |
| LEQWNLVIGF                    | Proline_Endopept, Trypsin, Cyanogen_Bromide, Trypsin_K, AspN, Clostripain, Trypsin_R                                               |
| VLAAVYRINW                    | Proline_Endopept, Cyanogen_Bromide, Trypsin_K, AspN, Staph_Protease, IodosoBenzoate                                                |
| DSGFAAYSRY                    | Proline_Endopept, Cyanogen_Bromide, Trypsin_K, AspN, Staph_Protease, IodosoBenzoate                                                |
| MHC class II binding peptides |                                                                                                                                    |
| LACFVLAAVYRINWI               | Proline_Endopept, Cyanogen_Bromide, Trypsin_K, AspN, Staph_Protease                                                                |
| TLACFVLAAVYRINW               | Proline_Endopept, Cyanogen_Bromide, Trypsin_K, AspN, Staph_Protease, IodosoBenzoate                                                |
| VTLACFVLAAVYRIN               | Proline_Endopept, Cyanogen_Bromide, Trypsin_K, AspN, Staph_Protease, IodosoBenzoate                                                |
| ACFVLAAVYRINWIT               | Proline_Endopept, Cyanogen_Bromide, Trypsin_K, AspN, Staph_Protease                                                                |
| CFVLAAVYRINWITG               | Proline_Endopept, Cyanogen_Bromide, Trypsin_K, AspN, Staph_Protease                                                                |
| IGFLFLTWICLLQFA               | Proline_Endopept, Trypsin, Cyanogen_Bromide, Trypsin_K, AspN, Clostripain, Staph_Protease, Trypsin_R                               |
| YRINWITGGIAIAMA               | Proline_Endopept, Trypsin_K, AspN, Staph_Protease                                                                                  |
| FVLAAVYRINWITGG               | Proline_Endopept, Cyanogen_Bromide, Trypsin_K, AspN, Staph_Protease                                                                |
| NLVIGFLFLTWICLL               | Proline_Endopept, Trypsin, Cyanogen_Bromide, Trypsin_K, AspN, Clostripain, Staph_Protease, Trypsin_R                               |
| LVIGFLFLTWICLLQ               | Proline_Endopept, Trypsin, Cyanogen_Bromide, Trypsin_K, AspN, Clostripain, Staph_Protease, Trypsin_R                               |
| WNLVIGFLFLTWICL               | Proline_Endopept, Trypsin, Cyanogen_Bromide, Trypsin_K, AspN, Clostripain, Staph_Protease, Trypsin_R                               |
| LTWICLLQFAYANRN               | Proline_Endopept, Cyanogen_Bromide, Trypsin_K, AspN, Staph_Protease                                                                |
| LEQWNLVIGFLFLTW               | Proline_Endopept, Trypsin, Cyanogen_Bromide, Trypsin_K, AspN, Clostripain, Trypsin_R                                               |

Supplementary Table 9C. Non-digesting enzymes of T-cell epitopes in N protein.

| Peptide                      | Non-digesting enzymes                                                                                                               |
|------------------------------|-------------------------------------------------------------------------------------------------------------------------------------|
| MHC class I binding peptides |                                                                                                                                     |
| KMKDLSRW                     | Chymotrypsin, Staph_Protease, IodosoBenzoate                                                                                        |
| KLDDKDPNF                    | Chymotrypsin, Cyanogen_Bromide, Clostripain, Staph_Protease, Trypsin_R, IodosoBenzoate                                              |
| KMKDLSRWY                    | Staph_Protease                                                                                                                      |
| DLSRWYFY                     | Cyanogen_Bromide, Trypsin_K, AspN, Staph_Protease                                                                                   |
| SSRGTSPAR                    | Chymotrypsin, Cyanogen_Bromide, Trypsin_K, AspN, Staph_Protease, Chymotrypsin(modified), IodosoBenzoate                             |
| GKMKDLSRW                    | Chymotrypsin, Staph_Protease, IodosoBenzoate                                                                                        |
| SSRSRNSSR                    | Proline_Endopept, Chymotrypsin, Cyanogen_Bromide, Trypsin_K, AspN, Staph_Protease, Elastase, Chymotrypsin(modified), IodosoBenzoate |
| NFKDQVILL                    | Proline_Endopept, Cyanogen_Bromide, Clostripain, Staph_Protease, Trypsin_R, IodosoBenzoate                                          |
| DPNFKDQVI                    | Cyanogen_Bromide, Clostripain, Staph_Protease, Trypsin_R, IodosoBenzoate                                                            |

Supplementary Table 10. Mutations observed in the 34 non-allergenic and non-toxic linear B-cell epitopes.

| start | end  | peptide                  | antigenicity | method | server                               | Protein | Peptide Length | RBD    | Topology | Allergenicity | Toxicity     | Mutations                           |
|-------|------|--------------------------|--------------|--------|--------------------------------------|---------|----------------|--------|----------|---------------|--------------|-------------------------------------|
| 34    | 41   | RGVYYPDK                 | 1.0191       |        | Kolaskar and Tongaonkar antigenicity | IEDB    | 8              | nonRBD | Outside  | Non-Toxin     | NON-ALLERGEN | No                                  |
| 65    | 70   | FHAHV                    | 1.6766       |        | Kolaskar and Tongaonkar antigenicity | IEDB    | 6              | nonRBD | Outside  | Non-Toxin     | NON-ALLERGEN | 65-72FHAHVSG-X                      |
| 70    | 78   | VSGTNGTKR                | 0.9855       |        | Hydrophilicity                       | BcePred | 9              | nonRBD | Outside  | Non-Toxin     | NON-ALLERGEN | 65-72FHAHVSG-X                      |
| 90    | 97   | VYFASTEK                 | 0.9206       |        | Flexibility                          | BcePred | 8              | nonRBD | Outside  | Non-Toxin     | NON-ALLERGEN | No                                  |
| 108   | 116  | TLTDSKTQS                | 1.0106       |        | Karplus and Schulz flexibility       | IEDB    | 9              | nonRBD | Outside  | Non-Toxin     | NON-ALLERGEN | 110L*                               |
| 108   | 117  | TLTDSKTQSL               | 0.99         |        | Accessibility                        | BcePred | 10             | nonRBD | Outside  | Non-Toxin     | NON-ALLERGEN | 110L*                               |
| 108   | 115  | TLTDSKTQ                 | 1.0912       |        | Flexibility                          | BcePred | 8              | nonRBD | Outside  | Non-Toxin     | NON-ALLERGEN | 110L*                               |
| 109   | 115  | TLTDSKTQ                 | 1.2584       |        | Parker hydrophilicity                | IEDB    | 7              | nonRBD | Outside  | Non-Toxin     | NON-ALLERGEN | 110L*                               |
| 109   | 115  | TLTDSKTQ                 | 1.2584       |        | Chou and Fasman beta turn            | IEDB    | 7              | nonRBD | Outside  | Non-Toxin     | NON-ALLERGEN | 110L*                               |
| 177   | 189  | MDLEGKQGNFKNL            | 1.2592       |        | Bepipred2.0                          | IEDB    | 13             | nonRBD | Outside  | Non-Toxin     | NON-ALLERGEN | No                                  |
| 180   | 188  | EKGQGNFKN                | 1.1232       |        | Parker hydrophilicity                | IEDB    | 9              | nonRBD | Outside  | Non-Toxin     | NON-ALLERGEN | No                                  |
| 265   | 273  | YVGYLQPR                 | 1.4692       |        | Antigenic_Propensity                 | BcePred | 9              | nonRBD | Outside  | Non-Toxin     | NON-ALLERGEN | No                                  |
| 278   | 287  | KYVNGTITD                | 0.9589       |        | Hydrophilicity                       | BcePred | 10             | nonRBD | Outside  | Non-Toxin     | NON-ALLERGEN | No                                  |
| 294   | 305  | DPLSEIKCTLKS             | 0.9204       |        | Karplus and Schulz flexibility       | IEDB    | 12             | nonRBD | Outside  | Non-Toxin     | NON-ALLERGEN | No                                  |
| 295   | 302  | PLSEIKCT                 | 1.2573       |        | Parker hydrophilicity                | IEDB    | 8              | nonRBD | Outside  | Non-Toxin     | NON-ALLERGEN | No                                  |
| 333   | 339  | TNLCPEG                  | 1.1812       |        | Kolaskar and Tongaonkar antigenicity | IEDB    | 7              | RBD    | Outside  | Non-Toxin     | NON-ALLERGEN | No                                  |
| 369   | 393  | YNSASFSTKCYGVSPFKLNDLCFT | 1.4031       |        | Bepipred2.0                          | IEDB    | 25             | RBD    | Outside  | Non-Toxin     | NON-ALLERGEN | No                                  |
| 380   | 389  | YGVSPFKLND               | 1.4531       |        | Chou and Fasman beta turn            | IEDB    | 10             | RBD    | Outside  | Non-Toxin     | NON-ALLERGEN | No                                  |
| 404   | 426  | GDEVRFQAPGTGKIADYNYKLP   | 1.1017       |        | Bepipred2.0                          | IEDB    | 23             | RBD    | Outside  | Non-Toxin     | NON-ALLERGEN | 408R>*,414-415QT>P; 414Q>K; 414Q>*; |
| 407   | 420  | VRQIAPGTGKIAD            | 1.2606       |        | Bepipred                             | IEDB    | 14             | RBD    | Outside  | Non-Toxin     | NON-ALLERGEN | 408R>*,414-415QT>P; 414Q>K; 414Q>*; |
| 411   | 425  | APGQTGKIADYNYKL          | 1.4441       |        | Parker hydrophilicity                | IEDB    | 15             | RBD    | Outside  | Non-Toxin     | NON-ALLERGEN | 414-; 414Q>E; 417K>*;               |
| 411   | 430  | APGQTGKIADYNYKLPDDFT     | 1.0425       |        | Chou and Fasman beta turn            | IEDB    | 20             | RBD    | Outside  | Non-Toxin     | NON-ALLERGEN | 414-415QT>P; 414Q>K; 414Q>*;        |
| 417   | 430  | KIADYNYKLPDDFT           | 0.9567       |        | Accessibility                        | BcePred | 14             | RBD    | Outside  | Non-Toxin     | NON-ALLERGEN | 417K>*                              |
| 505   | 519  | YQPRVYVLSPELLH           | 0.9711       |        | Antigenic_Propensity                 | BcePred | 15             | RBD    | Outside  | Non-Toxin     | NON-ALLERGEN | No                                  |
| 537   | 548  | KCVNFNENGLTG             | 1.6969       |        | Chou and Fasman beta turn            | IEDB    | 12             | RBD    | Outside  | Non-Toxin     | NON-ALLERGEN | No                                  |
| 545   | 558  | GLTGTGVLTESNKK           | 1.0227       |        | Karplus and Schulz flexibility       | IEDB    | 14             | nonRBD | Outside  | Non-Toxin     | NON-ALLERGEN | No                                  |
| 584   | 601  | ILDITPCSPGGVSVITPG       | 1.1031       |        | Antigenic_Propensity                 | BcePred | 18             | nonRBD | Outside  | Non-Toxin     | NON-ALLERGEN | No                                  |
| 614   | 620  | DVNCIEV                  | 2.2015       |        | Parker hydrophilicity                | IEDB    | 7              | nonRBD | Outside  | Non-Toxin     | NON-ALLERGEN | No                                  |
| 654   | 662  | EHVNNSYEC                | 1.068        |        | Parker hydrophilicity                | IEDB    | 9              | nonRBD | Outside  | Non-Toxin     | NON-ALLERGEN | No                                  |
| 705   | 714  | VAYSNSLAI                | 1.0545       |        | Chou and Fasman beta turn            | IEDB    | 10             | nonRBD | Outside  | Non-Toxin     | NON-ALLERGEN | No                                  |
| 1031  | 1039 | ECVLGQSKR                | 0.9377       |        | Flexibility                          | BcePred | 9              | nonRBD | Outside  | Non-Toxin     | NON-ALLERGEN | No                                  |
| 1033  | 1046 | VLGQSKRVDFCGKG           | 1.3582       |        | Parker hydrophilicity                | IEDB    | 14             | nonRBD | Outside  | Non-Toxin     | NON-ALLERGEN | No                                  |
| 1156  | 1168 | FKNHTSPDVLGD             | 1.0616       |        | Parker hydrophilicity                | IEDB    | 13             | nonRBD | Outside  | Non-Toxin     | NON-ALLERGEN | 1157-;1157K>*                       |
| 1157  | 1167 | KNHTSPDVLGD              | 1.4039       |        | Bepipred                             | IEDB    | 11             | nonRBD | Outside  | Non-Toxin     | NON-ALLERGEN | 1157-; 1157K>*                      |
